# Supplementary material for: Rare β-Resorcylic Acid Derivatives from a Halophyte-Associated Fungus Colletotrichum gloeosporioides JS0419 and Their Antifungal Activities
Source: MDPI journal article supplement (doi:10.3390/md20030195), 2022-03-07

## ***Supporting Information***

### **Rare $\beta$ -resorcylic acid derivatives from a halophyte-associated fungus *Colletotrichum gloeosporioides* JS0419 and their antifungal activities**

Sunghee Bang <sup>1,†</sup>, Jaekyeong Kim <sup>2,†</sup>, Jiwon Oh <sup>1</sup>, Ji-Seok Kim <sup>3</sup>, Seong-Ryong Yu <sup>3</sup>, Stephen T. Deyrup <sup>4</sup>, Yong-Sun Bahn <sup>3</sup> and Sang Hee Shim <sup>2,\*</sup>

<sup>1</sup>College of Pharmacy, Duksung Women's University, Seoul 01369, Republic of Korea

<sup>2</sup>Natural Products Research Institute, College of Pharmacy, Seoul National University, Seoul 08826, Republic of Korea

<sup>3</sup>Department of Biotechnology, College of Life Science and Biotechnology, Yonsei University, Seoul 03722, Republic of Korea

<sup>4</sup>Department of Chemistry and Biochemistry, Siena College, Loudonville, NY12211, USA

\*Correspondence: sanghee\_shim@snu.ac.kr; Tel.: 82-2-880-2479 (S.H.S.)

† Both authors equally contributed to this work.

# Table of Contents

**Figure S1.** HPLC-UV chromatogram of the initial EtOAc extract.

**Figure S2.**  $^1\text{H}$  NMR spectrum (500 MHz,  $\text{CD}_3\text{OD}$ ) of (**1**)

**Figure S3.**  $^{13}\text{C}$  NMR spectrum (125 MHz,  $\text{CD}_3\text{OD}$ ) of (**1**)

**Figure S4.**  $^1\text{H}$ - $^1\text{H}$  COSY spectrum (500 MHz,  $\text{CD}_3\text{OD}$ ) of (**1**)

**Figure S5.** HSQC spectrum (500 MHz,  $\text{CD}_3\text{OD}$ ) of (**1**)

**Figure S6.** HMBC spectrum (500 MHz,  $\text{CD}_3\text{OD}$ ) of (**1**)

**Figure S7.**  $^1\text{H}$  NMR spectrum (500 MHz,  $\text{CD}_3\text{OD}$ ) of acetylated derivative of (**1**)

**Figure S8.** HETLOC spectrum (800 MHz,  $\text{CD}_3\text{OD}$ ) of (**1**)

**Figure S9.**  $^1\text{H}$  NMR spectrum (500 MHz,  $\text{CD}_3\text{OD}$ ) of acetonide product (**1a**)

**Figure S10.**  $^{13}\text{C}$  NMR spectrum (125 MHz,  $\text{CD}_3\text{OD}$ ) of acetonide product (**1a**)

**Figure S11.** HMBC spectrum (500 MHz,  $\text{CD}_3\text{OD}$ ) of acetonide product (**1a**)

**Figure S12.**  $^1\text{H}$  NMR spectrum (500 MHz,  $\text{CD}_3\text{OD}$ ) of *S*-MTPA ester (**1b**)

**Figure S13.**  $^1\text{H}$ - $^1\text{H}$  COSY spectrum (500 MHz,  $\text{CD}_3\text{OD}$ ) of *S*-MTPA ester (**1b**)

**Figure S14.**  $^1\text{H}$  NMR spectrum (500 MHz,  $\text{CD}_3\text{OD}$ ) of *R*-MTPA ester (**1c**)

**Figure S15.**  $^1\text{H}$ - $^1\text{H}$  COSY spectrum (500 MHz,  $\text{CD}_3\text{OD}$ ) of *R*-MTPA ester (**1c**)

**Figure S16.** HRESIMS spectrum of (**1**)

**Figure S17.**  $^1\text{H}$  NMR spectrum (500 MHz,  $\text{CD}_3\text{OD}$ ) of (**2**)

**Figure S18.**  $^{13}\text{C}$  NMR spectrum (125 MHz,  $\text{CD}_3\text{OD}$ ) of (**2**)

**Figure S19.**  $^1\text{H}$ - $^1\text{H}$  COSY spectrum (500 MHz,  $\text{CD}_3\text{OD}$ ) of (**2**)

**Figure S20.** HSQC spectrum (500 MHz,  $\text{CD}_3\text{OD}$ ) of (**2**)

**Figure S21.** HMBC spectrum (500 MHz,  $\text{CD}_3\text{OD}$ ) of (**2**)

**Figure S22.** HRESIMS spectrum of (**2**)

**Figure S23.**  $^1\text{H}$  NMR spectrum (500 MHz,  $\text{CD}_3\text{OD}$ ) of (**3**)

**Figure S24.**  $^{13}\text{C}$  NMR spectrum (125 MHz,  $\text{CD}_3\text{OD}$ ) of (**3**)

**Figure S25.**  $^1\text{H}$ - $^1\text{H}$  COSY spectrum (500 MHz,  $\text{CD}_3\text{OD}$ ) of (**3**)

**Figure S26.** HSQC spectrum (500 MHz,  $\text{CD}_3\text{OD}$ ) of (**3**)

**Figure S27.** HMBC spectrum (500 MHz,  $\text{CD}_3\text{OD}$ ) of (**3**)

**Figure S28.** HETLOC spectrum (800 MHz, CD<sub>3</sub>OD) of (3)

**Figure S29.** <sup>1</sup>H NMR spectrum (500 MHz, CD<sub>3</sub>OD) of acetonide product (3a)

**Figure S30.** <sup>13</sup>C NMR spectrum (125 MHz, CD<sub>3</sub>OD) of acetonide product (3a)

**Figure S31.** HMBC spectrum (500 MHz, CD<sub>3</sub>OD) of acetonide product (3a)

**Figure S32.** HRESIMS spectrum of (3)

**Figure S33.** <sup>1</sup>H NMR spectrum (500 MHz, CD<sub>3</sub>OD) of (4)

**Figure S34.** <sup>13</sup>C NMR spectrum (125 MHz, CD<sub>3</sub>OD) of (4)

**Figure S35.** <sup>1</sup>H-<sup>1</sup>H COSY spectrum (500 MHz, CD<sub>3</sub>OD) of (4)

**Figure S36.** HSQC spectrum (500 MHz, CD<sub>3</sub>OD) of (4)

**Figure S37.** HMBC spectrum (500 MHz, CD<sub>3</sub>OD) of (4)

**Figure S38.** HRESIMS spectrum of (4)

**Figure S39.** <sup>1</sup>H NMR spectrum (500 MHz, CD<sub>3</sub>OD) of (5)

**Figure S40.** <sup>13</sup>C NMR spectrum (125 MHz, CD<sub>3</sub>OD) of (5)

**Figure S41.** <sup>1</sup>H-<sup>1</sup>H COSY spectrum (500 MHz, CD<sub>3</sub>OD) of (5)

**Figure S42.** HSQC spectrum (500 MHz, CD<sub>3</sub>OD) of (5)

**Figure S43.** HMBC spectrum (500 MHz, CD<sub>3</sub>OD) of (5)

**Figure S44.** HRESIMS spectrum of (5)

**Figure S45.** <sup>1</sup>H NMR spectrum (500 MHz, CD<sub>3</sub>OD) of (6)

**Figure S46.** <sup>13</sup>C NMR spectrum (125 MHz, CD<sub>3</sub>OD) of (6)

**Figure S47.** <sup>1</sup>H-<sup>1</sup>H COSY spectrum (500 MHz, CD<sub>3</sub>OD) of (6)

**Figure S48.** HSQC spectrum (500 MHz, CD<sub>3</sub>OD) of (6)

**Figure S49.** HMBC spectrum (500 MHz, CD<sub>3</sub>OD) of (6)

**Figure S50.** HRESIMS spectrum of (6)

**Figure S51.** <sup>1</sup>H NMR spectrum (500 MHz, CD<sub>3</sub>OD) of (8)

**Figure S52.** <sup>13</sup>C NMR spectrum (125 MHz, CD<sub>3</sub>OD) of (8)

**Figure S53.** <sup>1</sup>H-<sup>1</sup>H COSY spectrum (500 MHz, CD<sub>3</sub>OD) of (8)

**Figure S54.** HSQC spectrum (500 MHz, CD<sub>3</sub>OD) of (8)

**Figure S55.** HMBC spectrum (500 MHz, CD<sub>3</sub>OD) of (8)

**Figure S56.** HRESIMS spectrum of (8)

**Figure S1.** HPLC-UV chromatogram of the initial EtOAc extract.

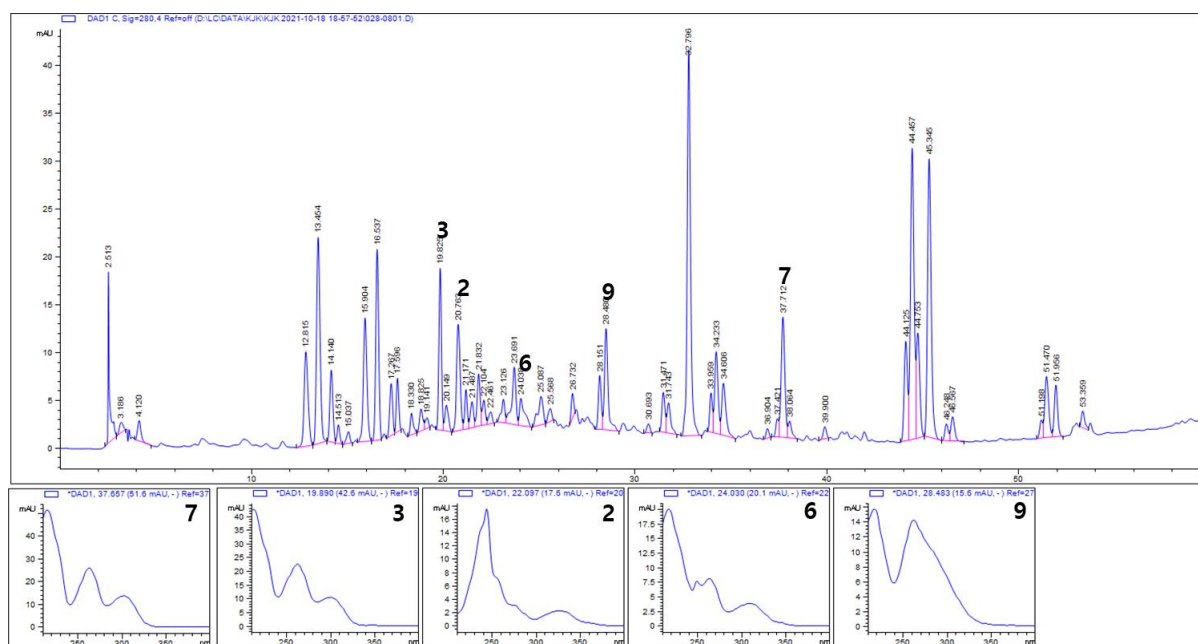

**Figure S2.**  $^1\text{H}$  NMR spectrum (500 MHz,  $\text{CD}_3\text{OD}$ ) of (1)

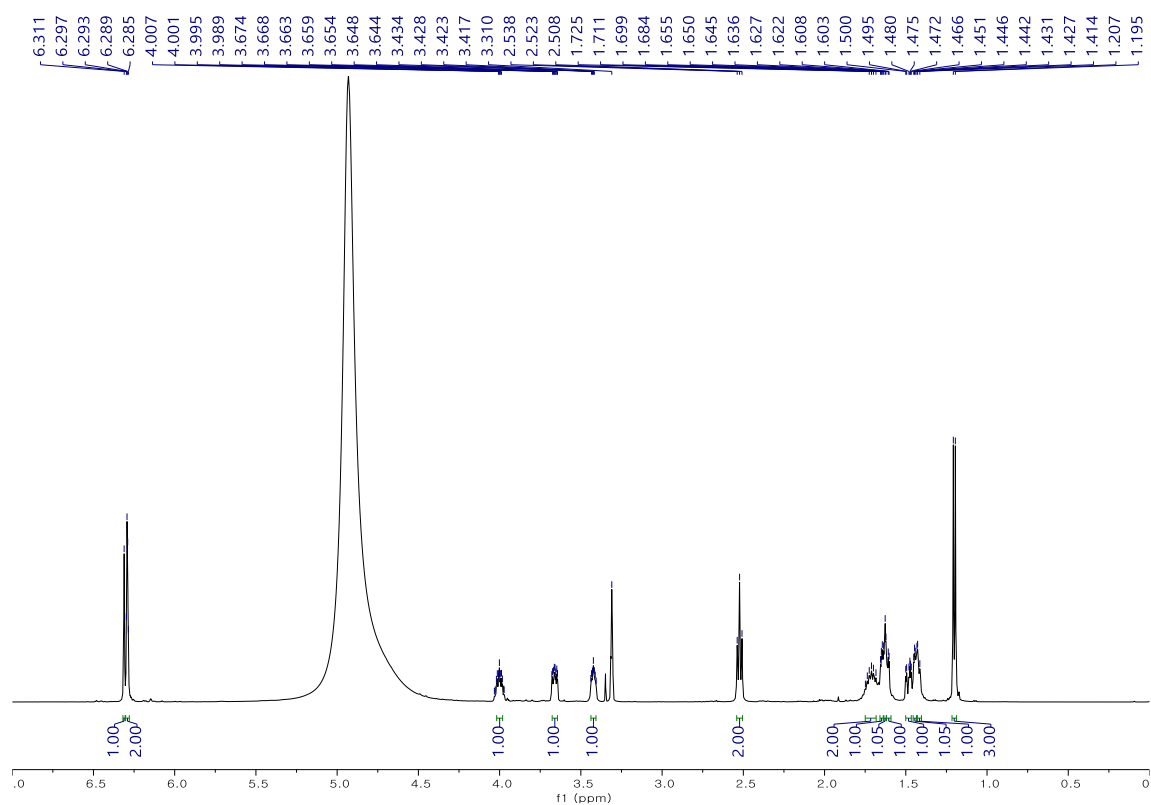

**Figure S3.**  $^{13}\text{C}$  NMR spectrum (125 MHz,  $\text{CD}_3\text{OD}$ ) of (1)

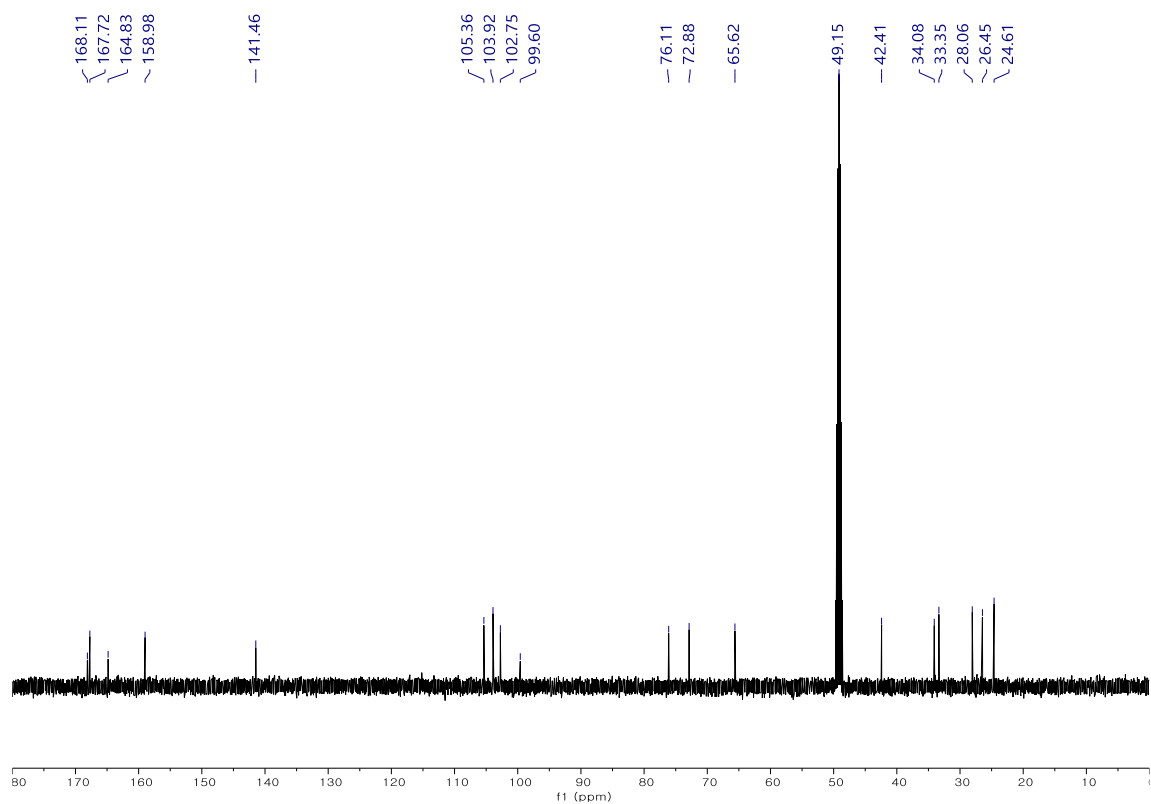

**Figure S4.**  $^1\text{H}$ - $^1\text{H}$  COSY spectrum (500 MHz,  $\text{CD}_3\text{OD}$ ) of (1)

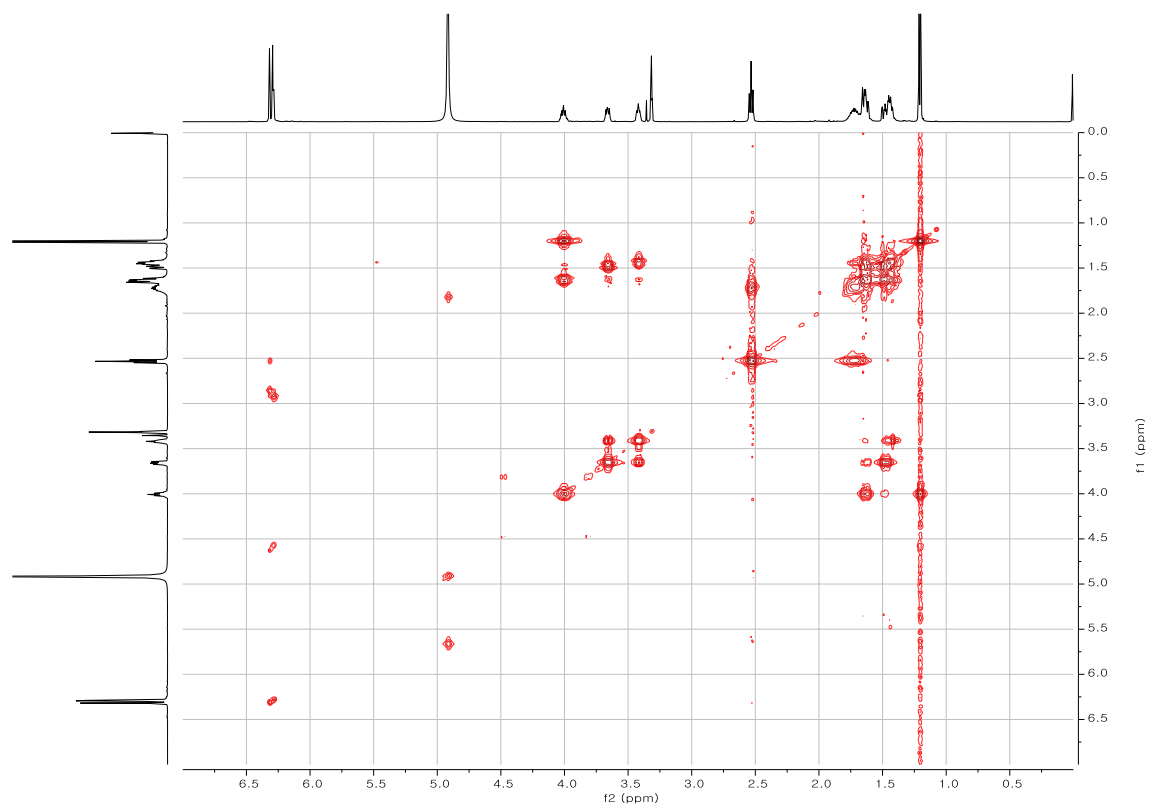

**Figure S5.** HSQC spectrum (500 MHz,  $\text{CD}_3\text{OD}$ ) of (1)

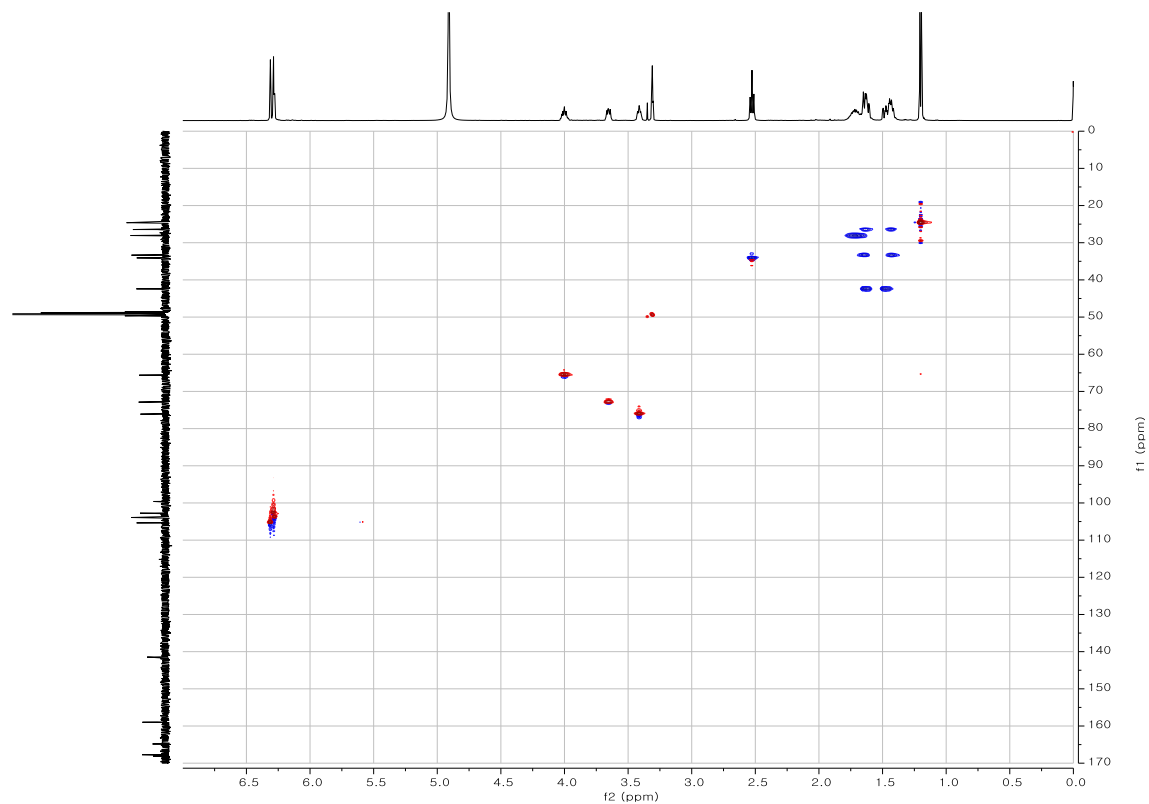

**Figure S6.** HMBC spectrum (500 MHz, CD<sub>3</sub>OD) of (1)

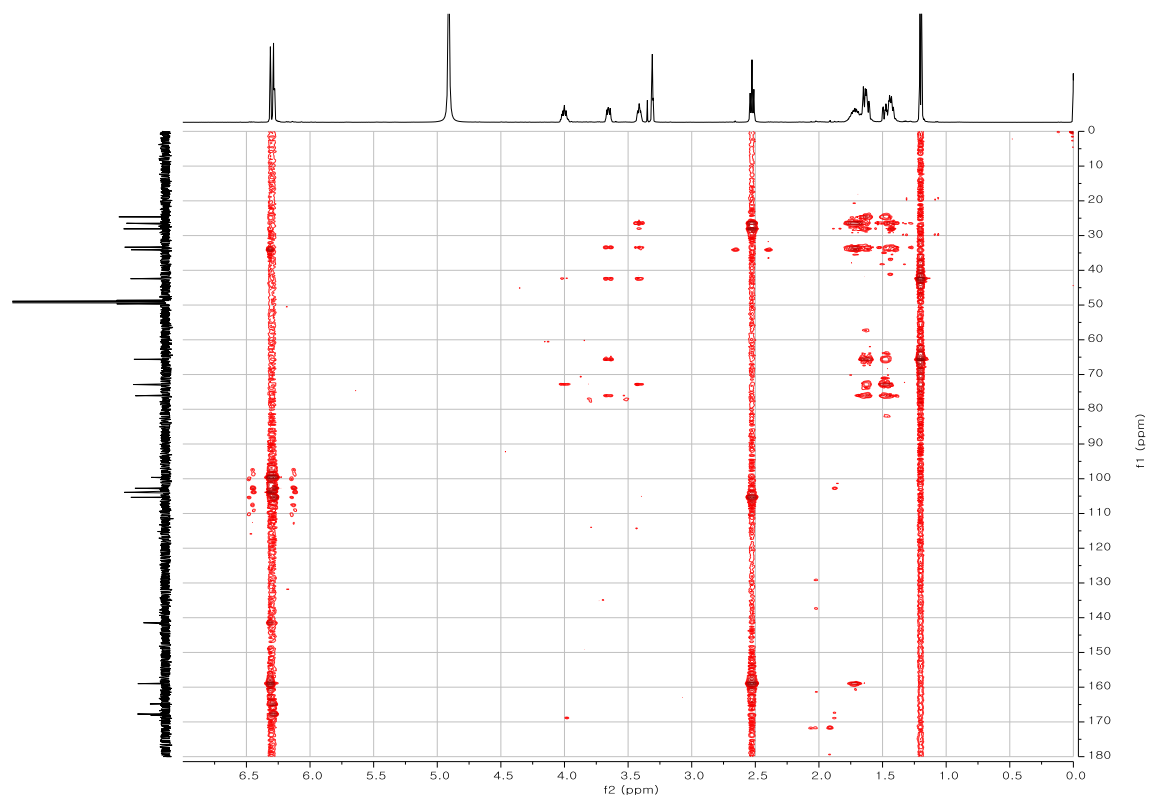

**Figure S7.** <sup>1</sup>H NMR spectrum (500 MHz, CD<sub>3</sub>OD) of acetylated derivative of (1)

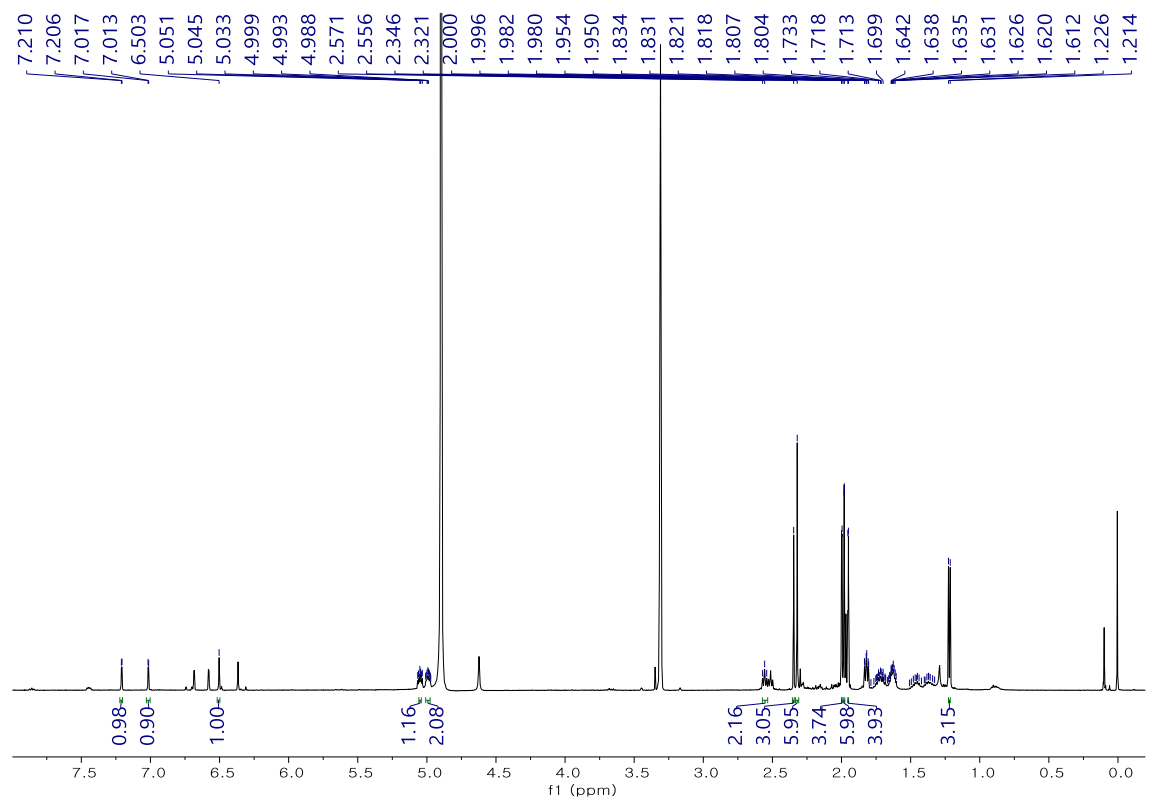

**Figure S8.** HETLOC spectrum (800 MHz, CD<sub>3</sub>OD) of (1)

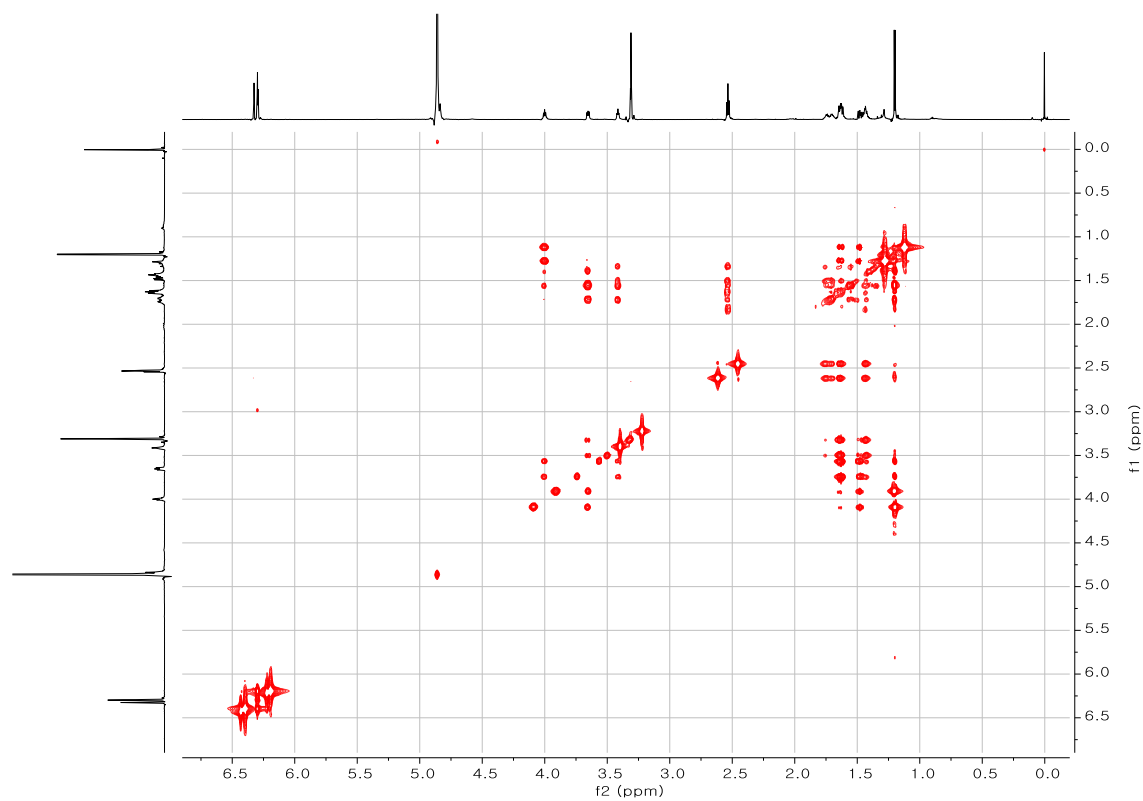

**Figure S9.** <sup>1</sup>H NMR spectrum (500 MHz, CD<sub>3</sub>OD) of acetonide product (1a)

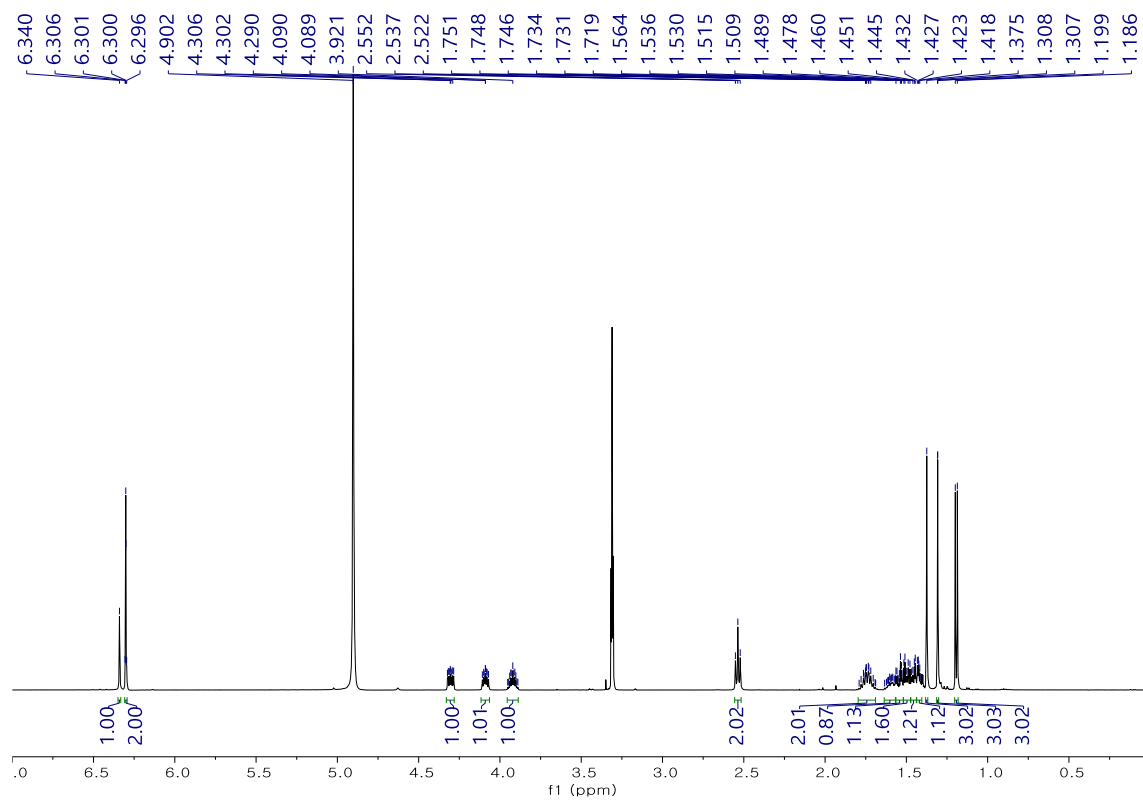



**Figure S10.**  $^{13}\text{C}$  NMR spectrum (125 MHz,  $\text{CD}_3\text{OD}$ ) of acetonide product (**1a**)

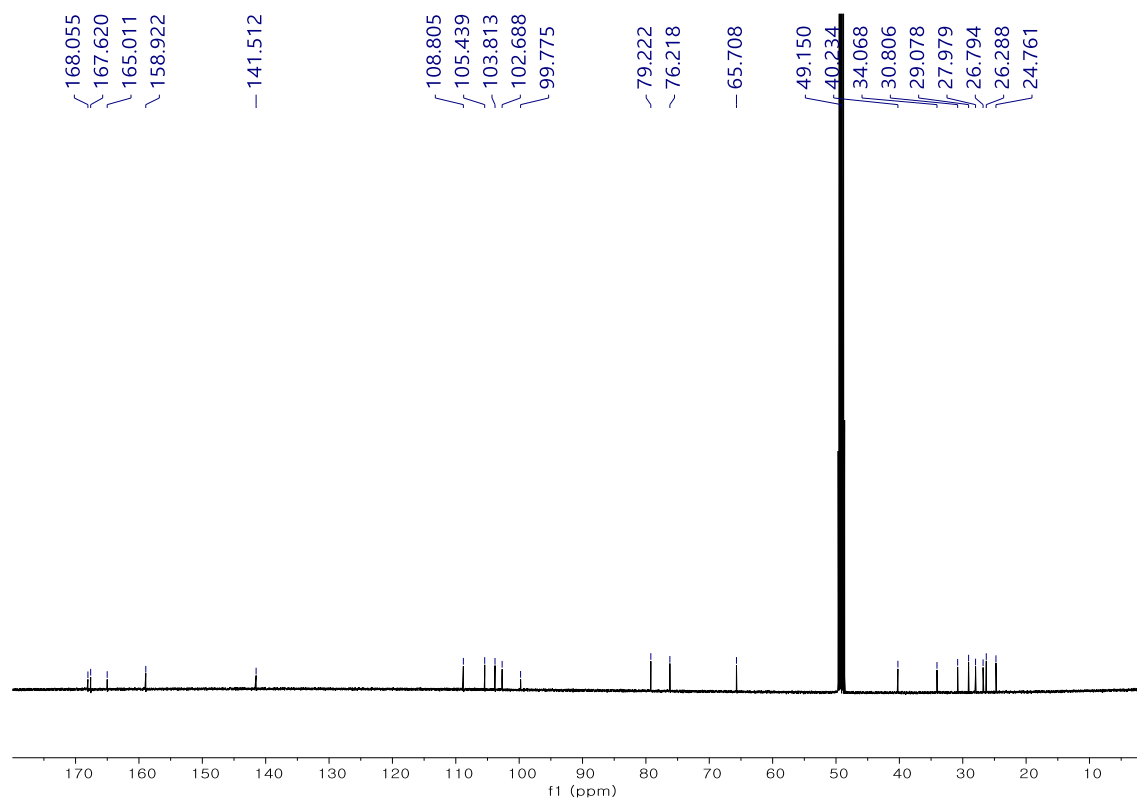

**Figure S11.** HMBC spectrum (500 MHz,  $\text{CD}_3\text{OD}$ ) of acetonide product (**1a**)

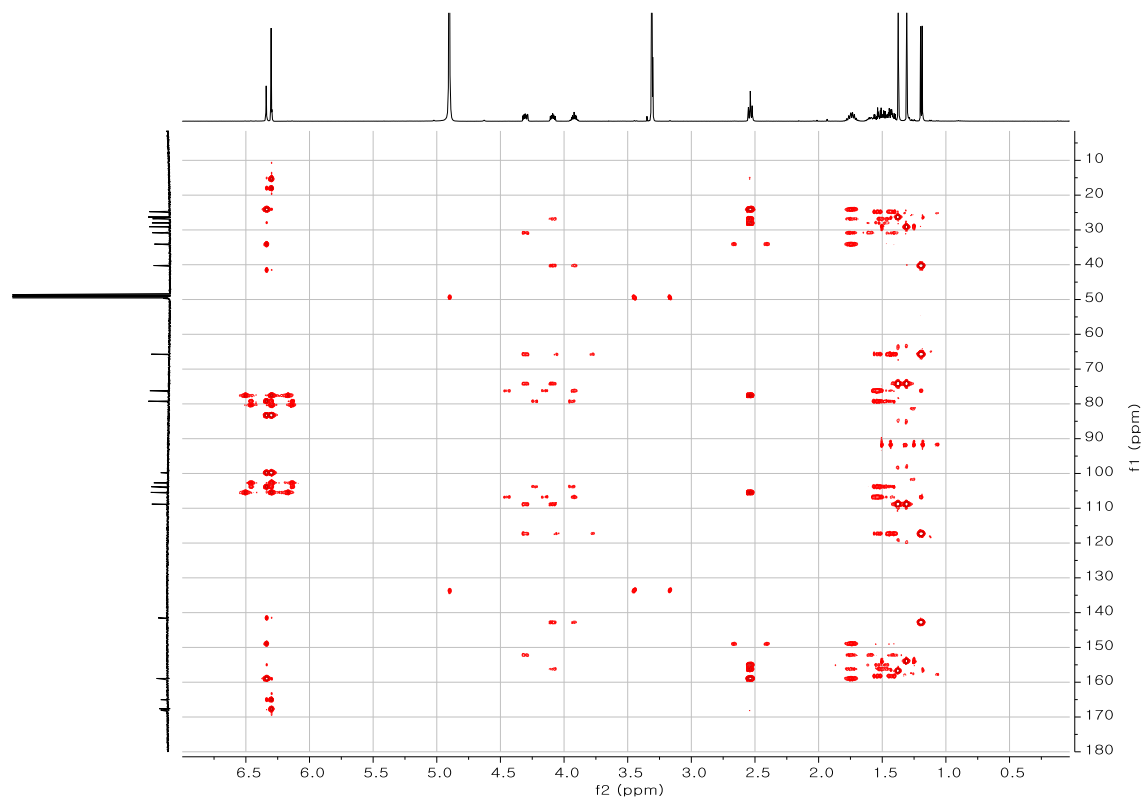

**Figure S12.**  $^1\text{H}$  NMR spectrum (500 MHz,  $\text{CD}_3\text{OD}$ ) of *S*-MTPA ester (**1b**)

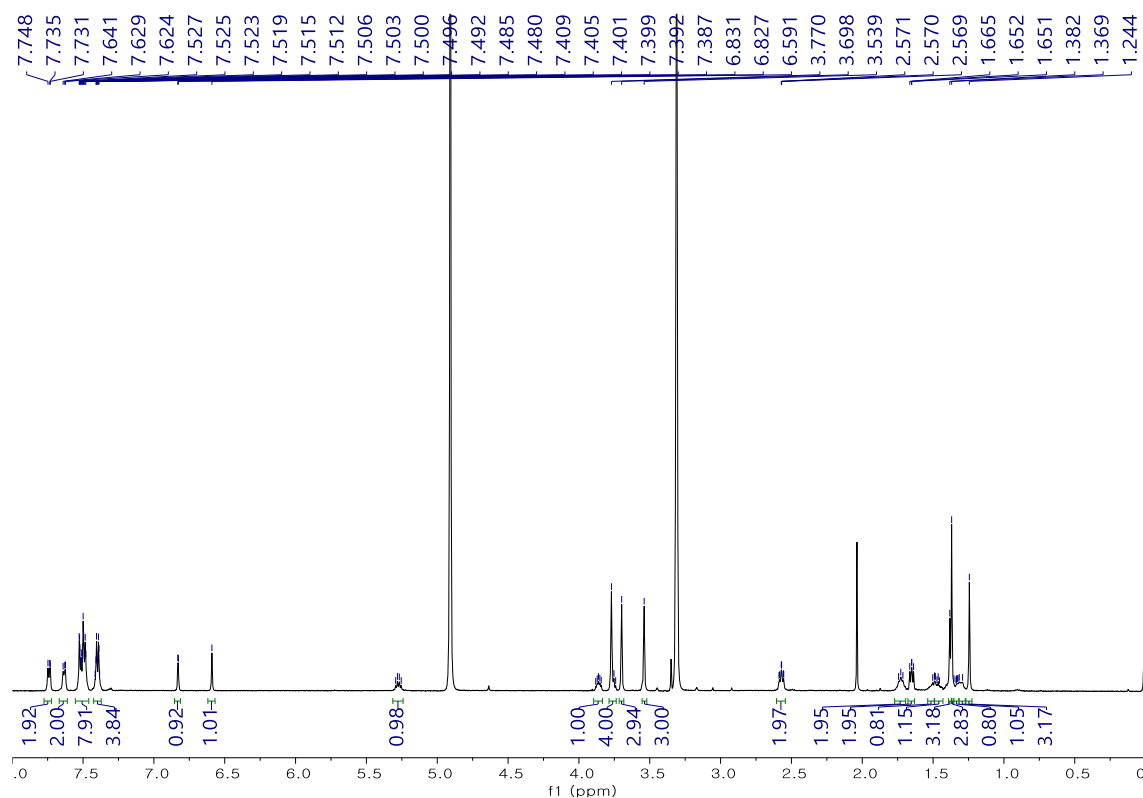

**Figure S13.**  $^1\text{H}$ - $^1\text{H}$  COSY spectrum (500 MHz,  $\text{CD}_3\text{OD}$ ) of *S*-MTPA ester (**1b**)

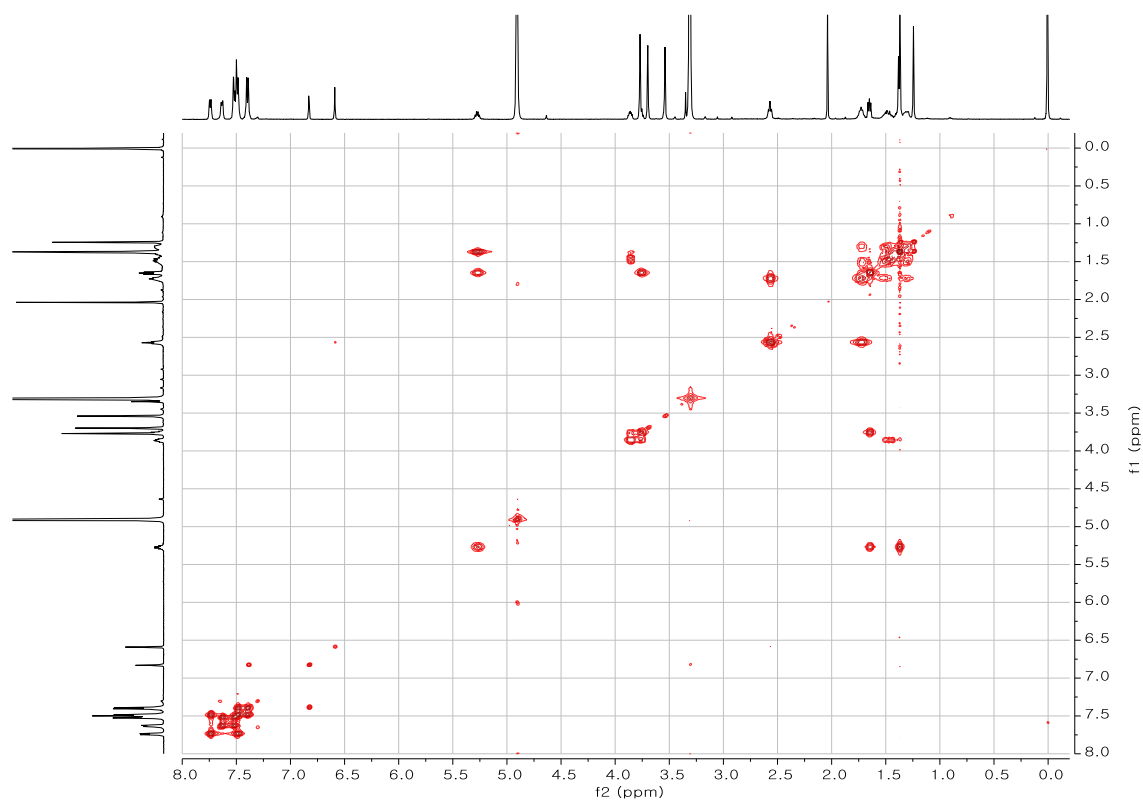

**Figure S14.**  $^1\text{H}$  NMR spectrum (500 MHz,  $\text{CD}_3\text{OD}$ ) of *R*-MTPA ester (**1c**)

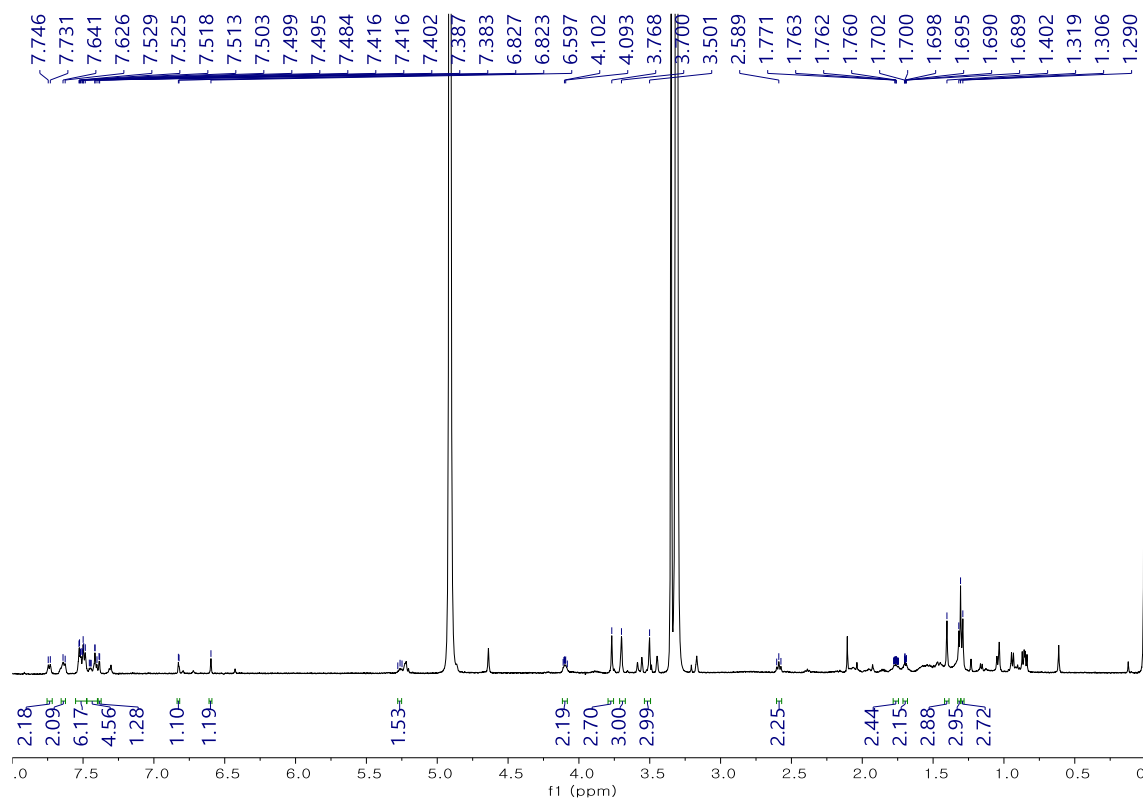

**Figure S15.**  $^1\text{H}$ - $^1\text{H}$  COSY spectrum (500 MHz,  $\text{CD}_3\text{OD}$ ) of *R*-MTPA ester (**1c**)

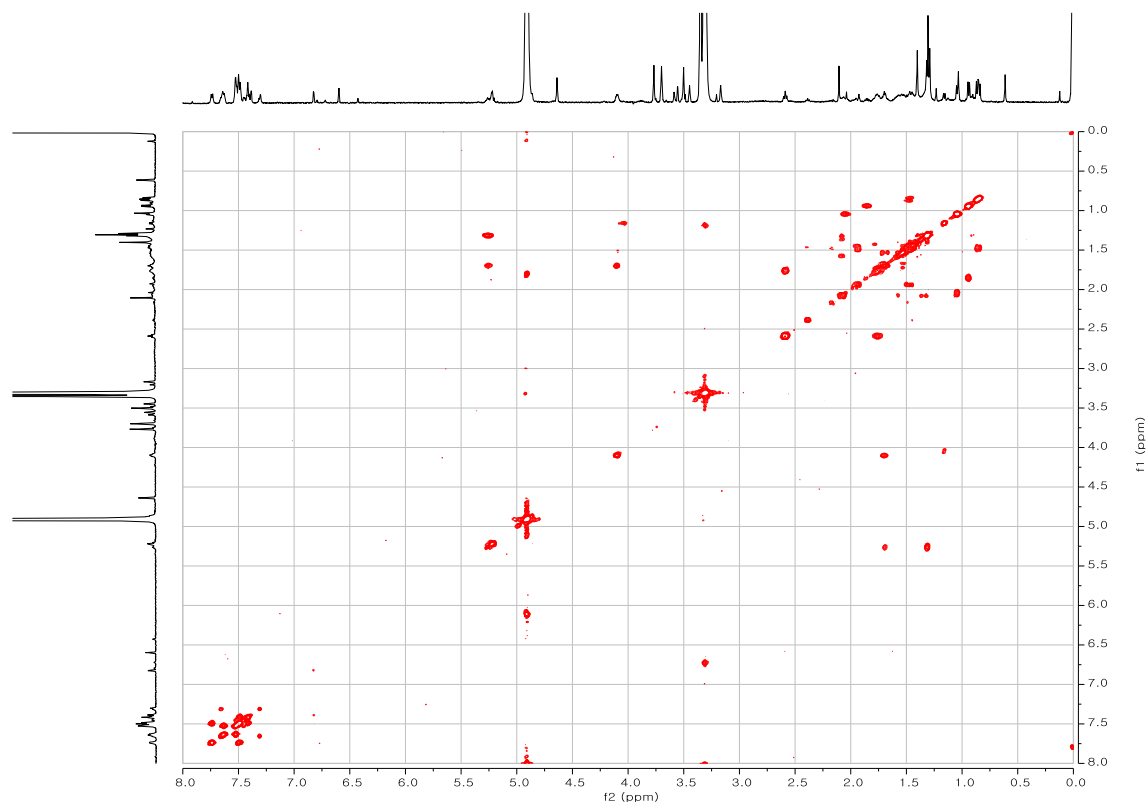

**Figure S16.** HRESIMS spectrum of (1)

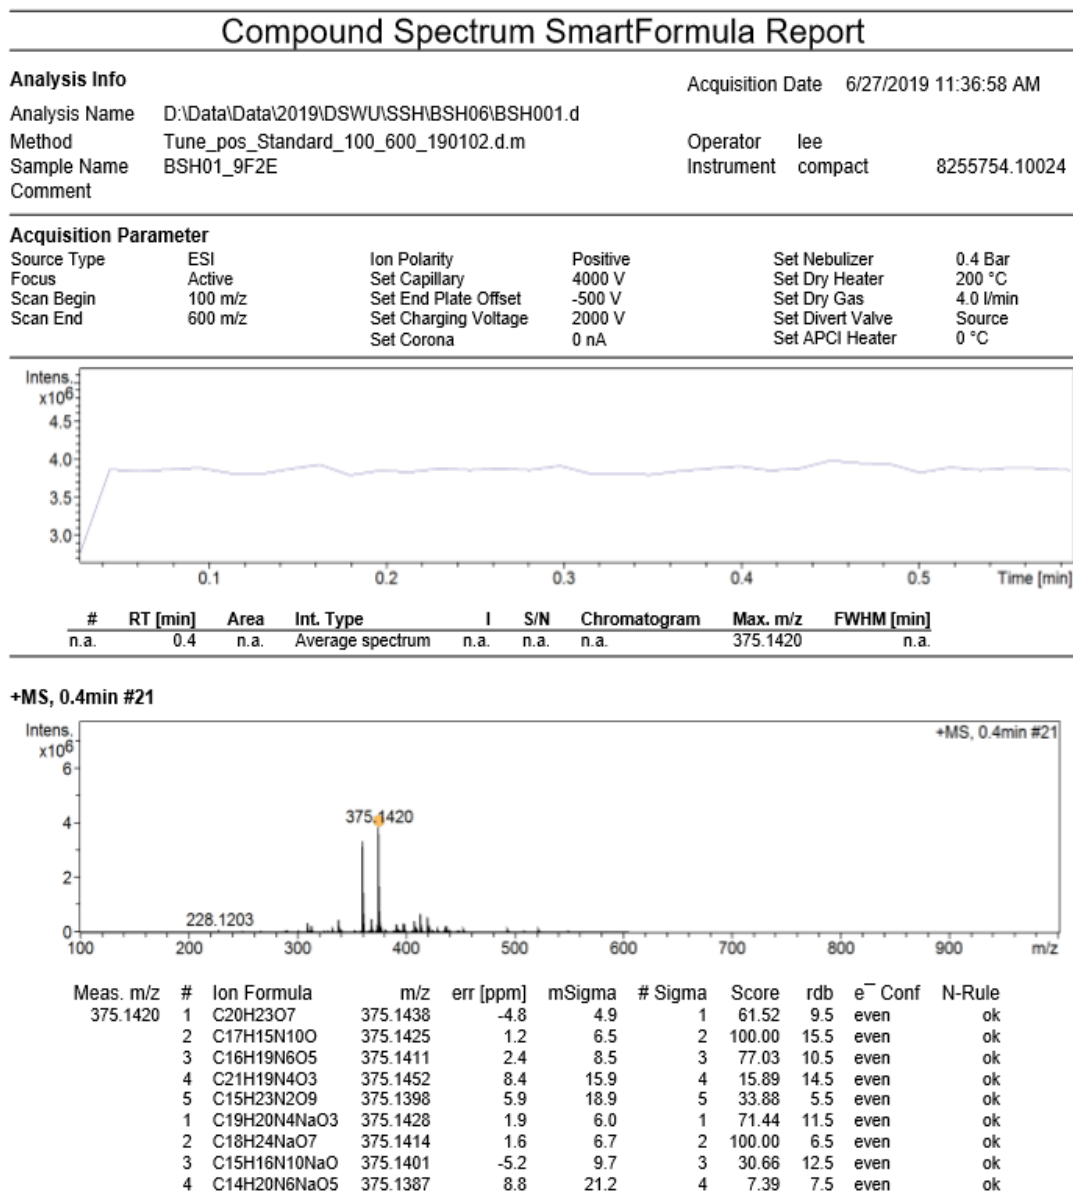

**Figure S17.**  $^1\text{H}$  NMR spectrum (500 MHz,  $\text{CD}_3\text{OD}$ ) of (**2**)

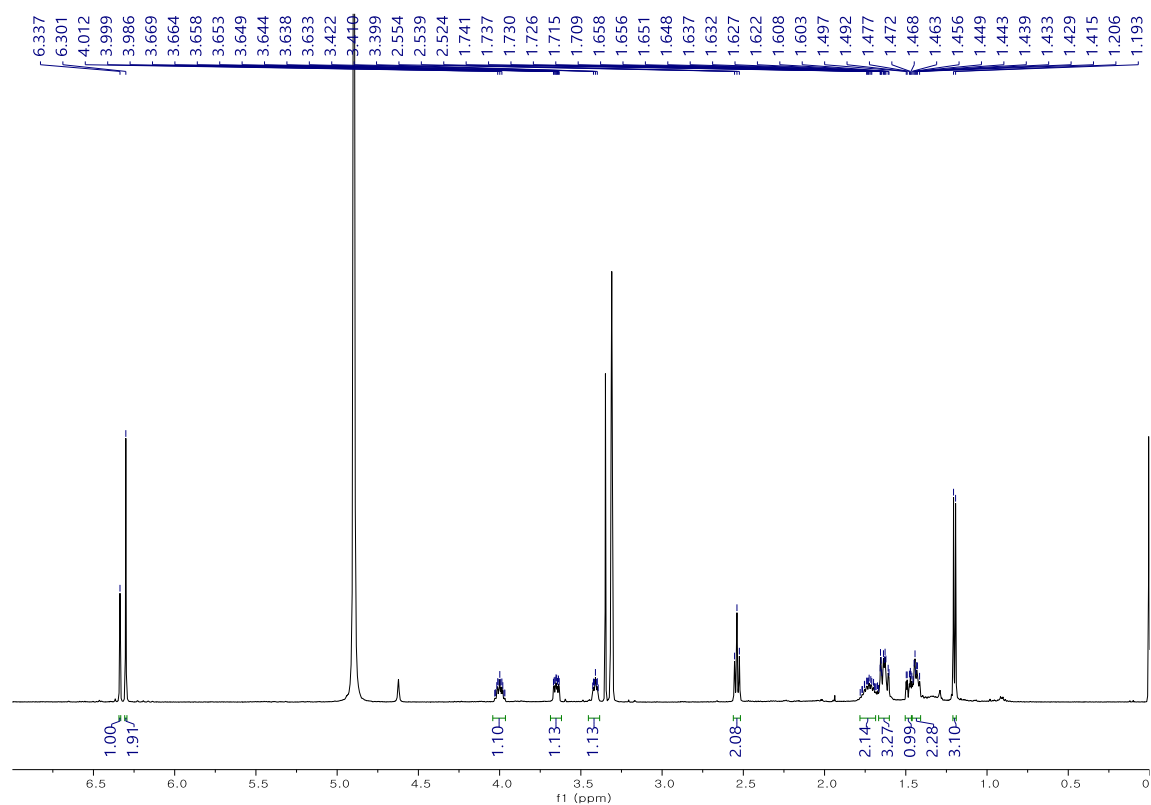

**Figure S18.**  $^{13}\text{C}$  NMR spectrum (125 MHz,  $\text{CD}_3\text{OD}$ ) of (**2**)

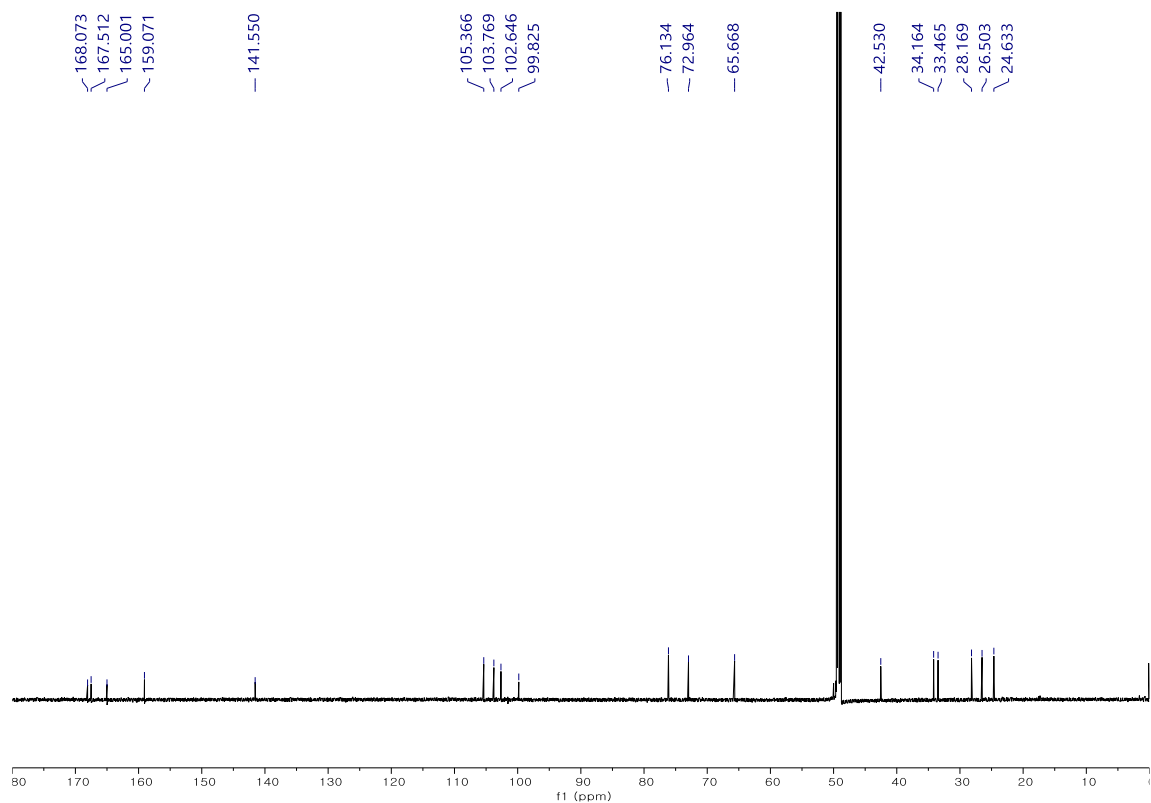

**Figure S19.**  $^1\text{H}$ - $^1\text{H}$  COSY spectrum (500 MHz,  $\text{CD}_3\text{OD}$ ) of (2)

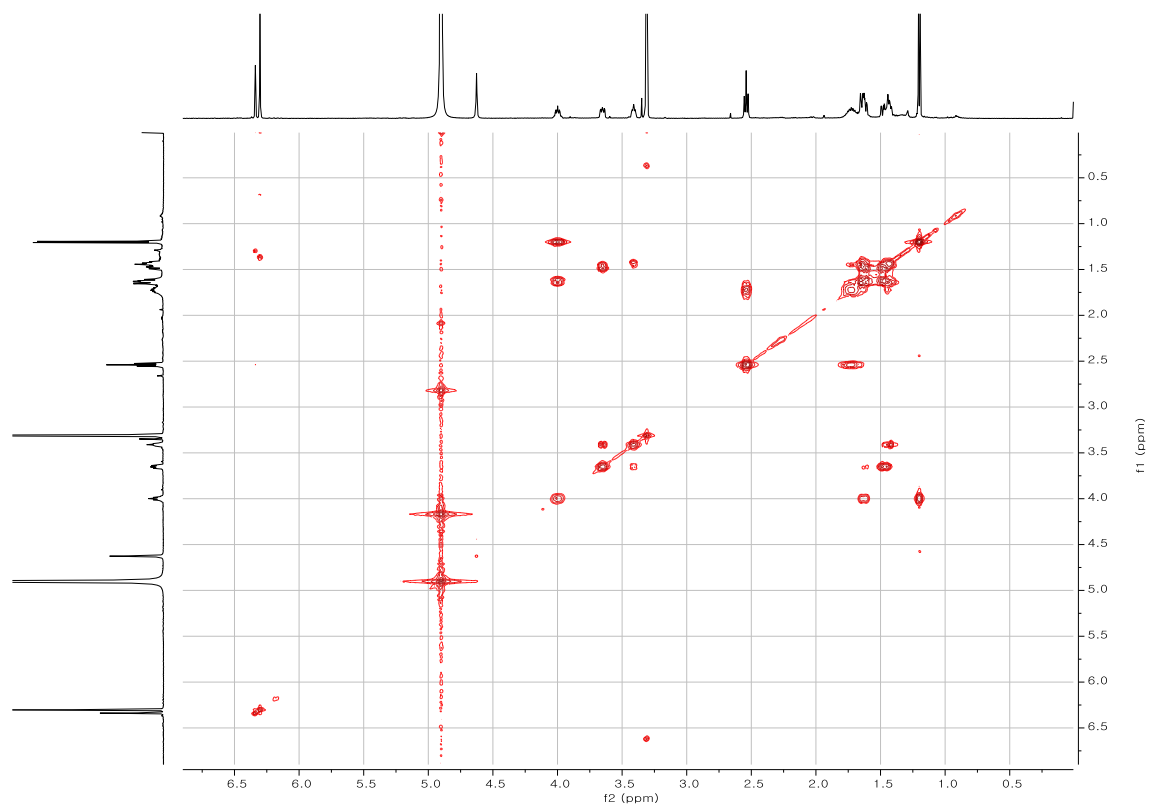

**Figure S20.** HSQC spectrum (500 MHz,  $\text{CD}_3\text{OD}$ ) of (2)

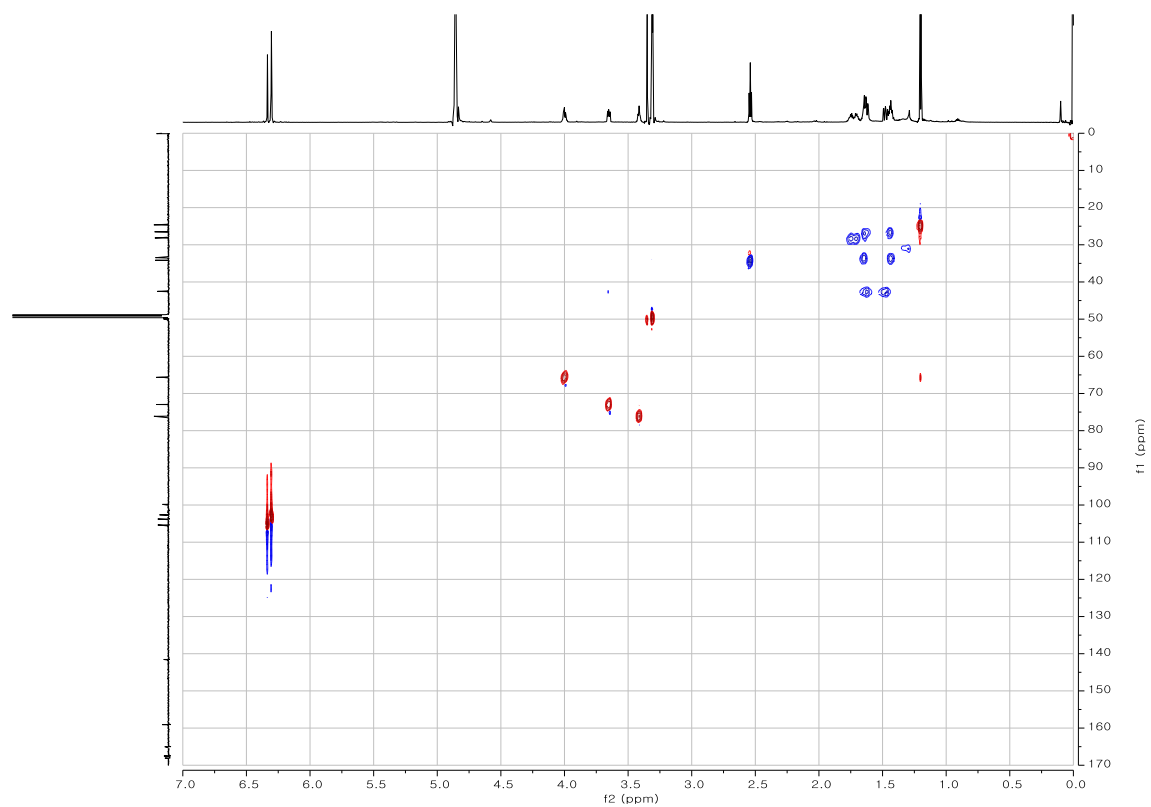

**Figure S21.** HMBC spectrum (500 MHz, CD<sub>3</sub>OD) of (2)

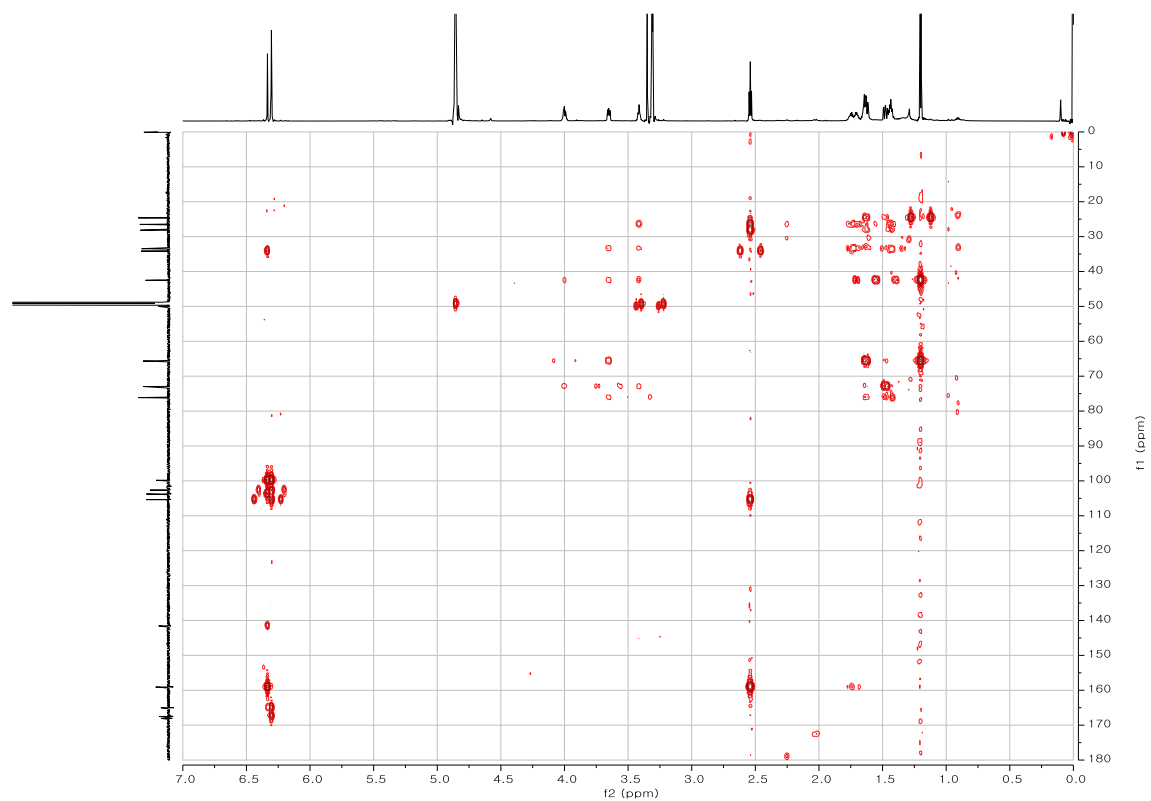

Figure S22. HRESIMS spectrum of (2)

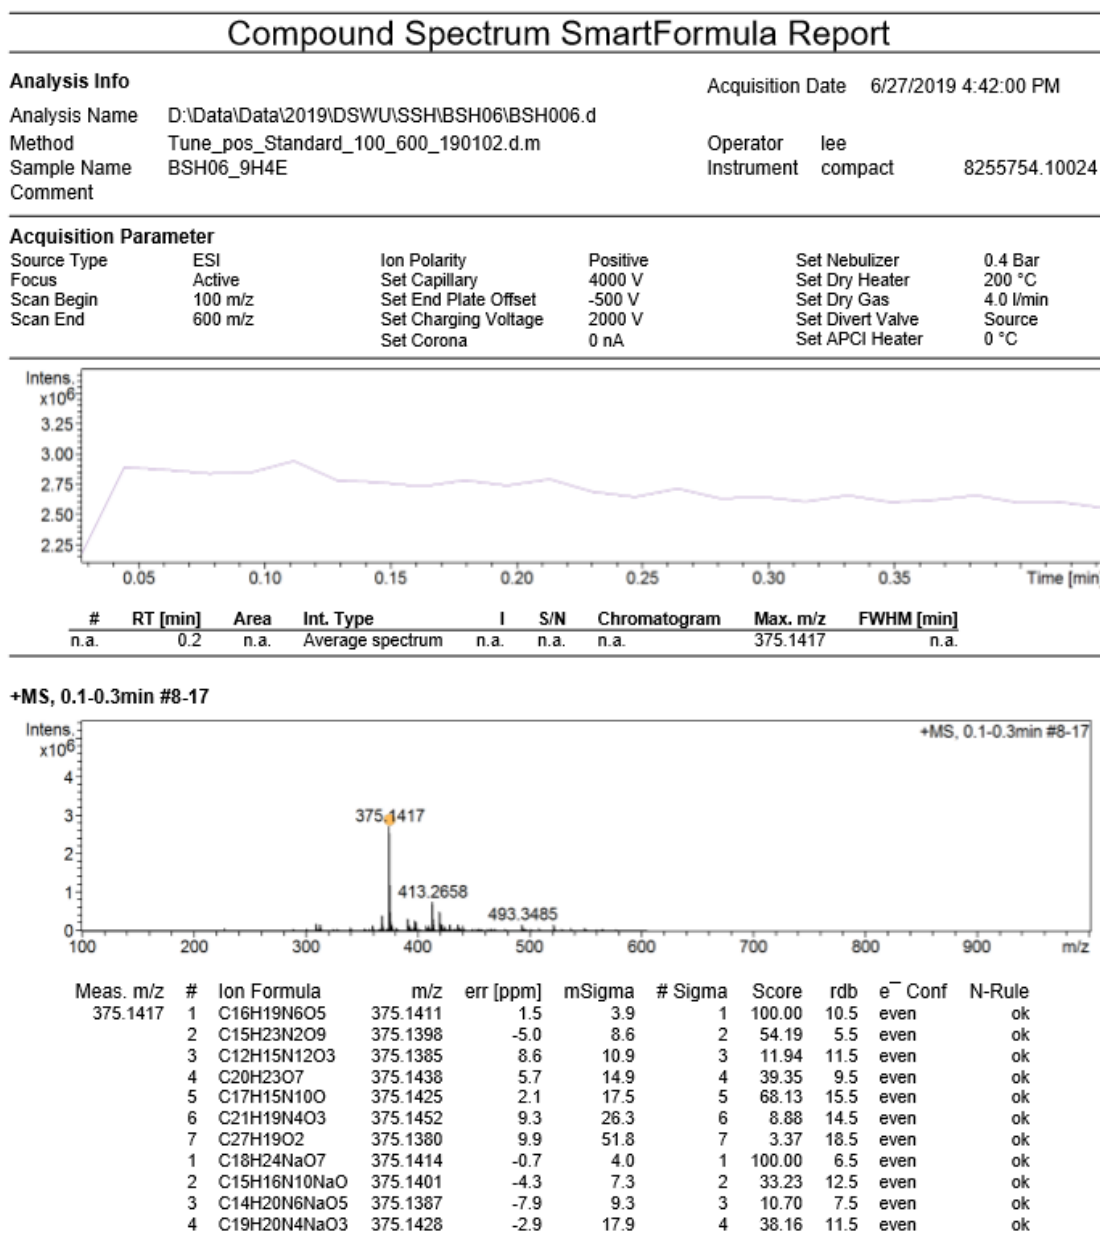



**Figure S23.**  $^1\text{H}$  NMR spectrum (500 MHz,  $\text{CD}_3\text{OD}$ ) of (**3**)

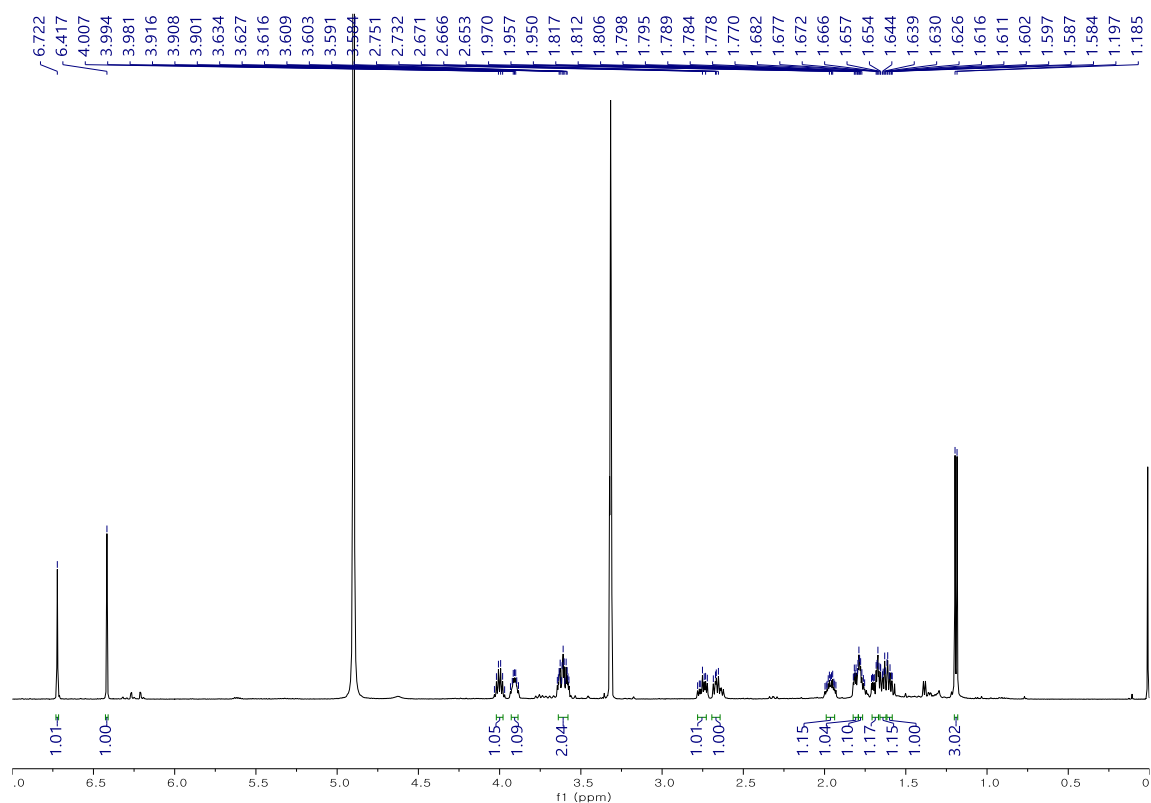

**Figure S24.**  $^{13}\text{C}$  NMR spectrum (125 MHz,  $\text{CD}_3\text{OD}$ ) of (**3**)

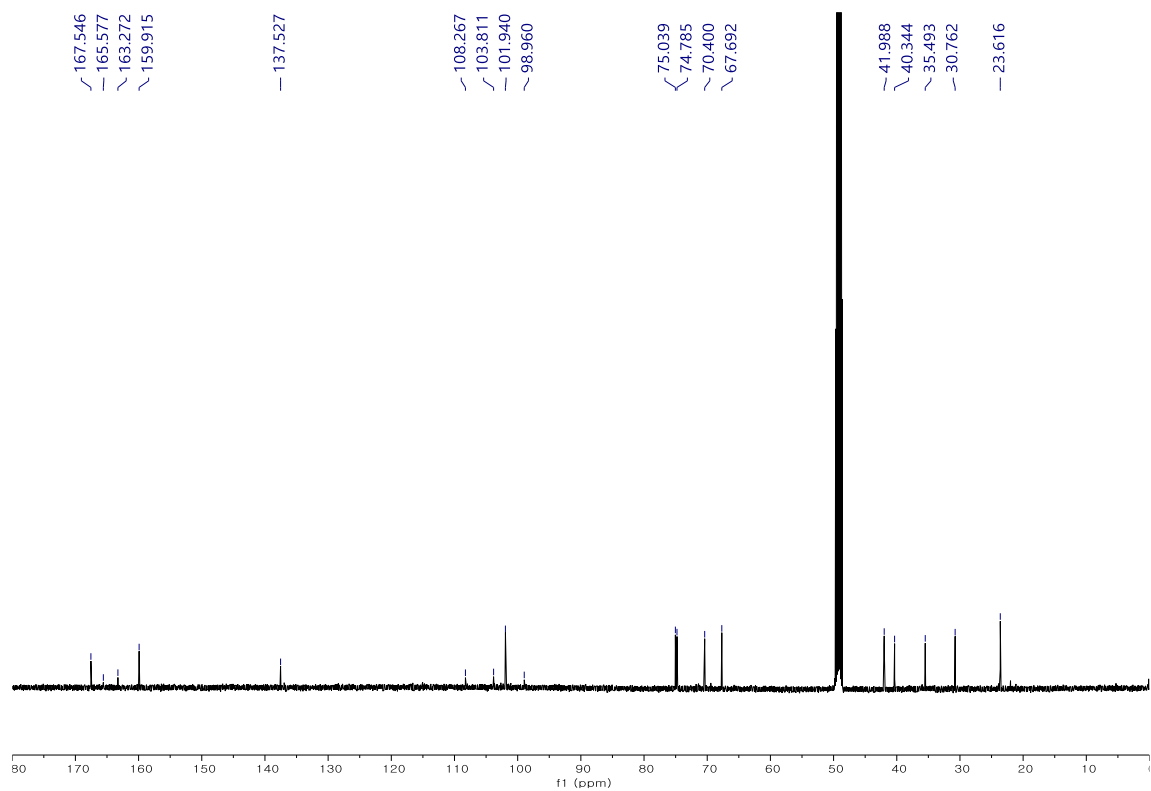

**Figure S25.**  $^1\text{H}$ - $^1\text{H}$  COSY spectrum (500 MHz,  $\text{CD}_3\text{OD}$ ) of (3)

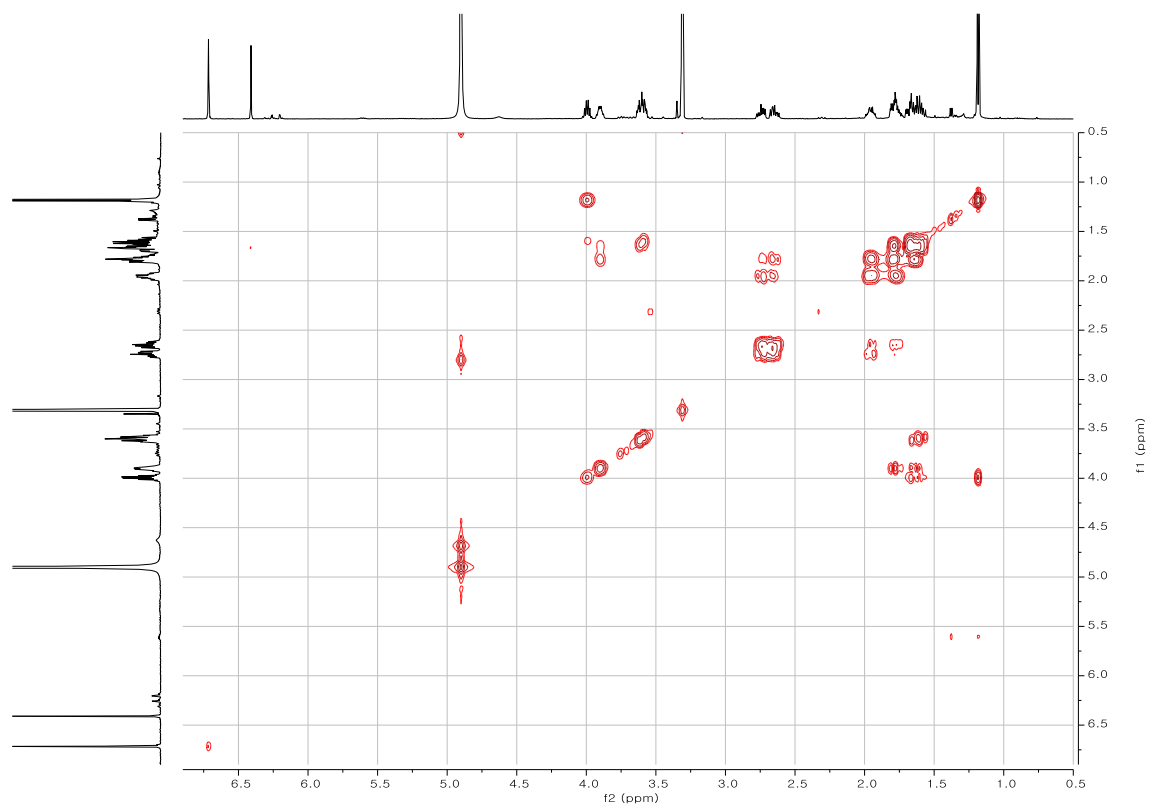

**Figure S26.** HSQC spectrum (500 MHz,  $\text{CD}_3\text{OD}$ ) of (3)

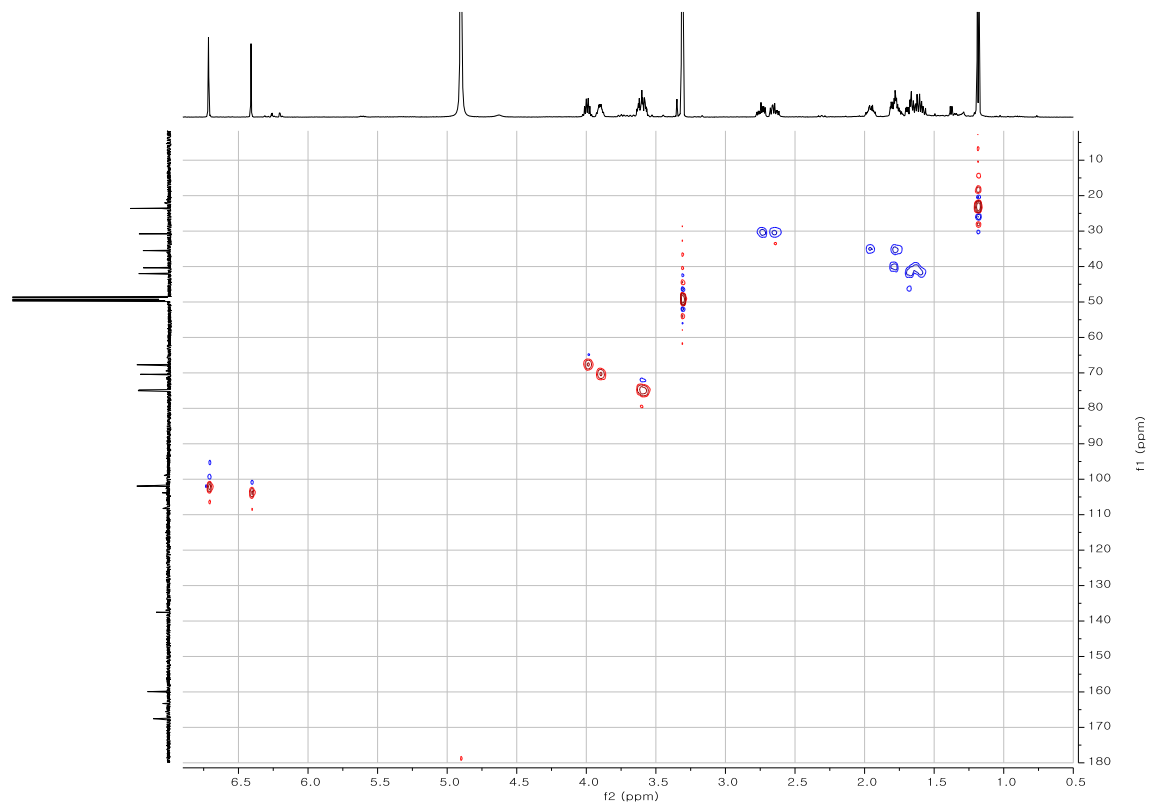

**Figure S27.** HMBC spectrum (500 MHz, CD<sub>3</sub>OD) of (3)

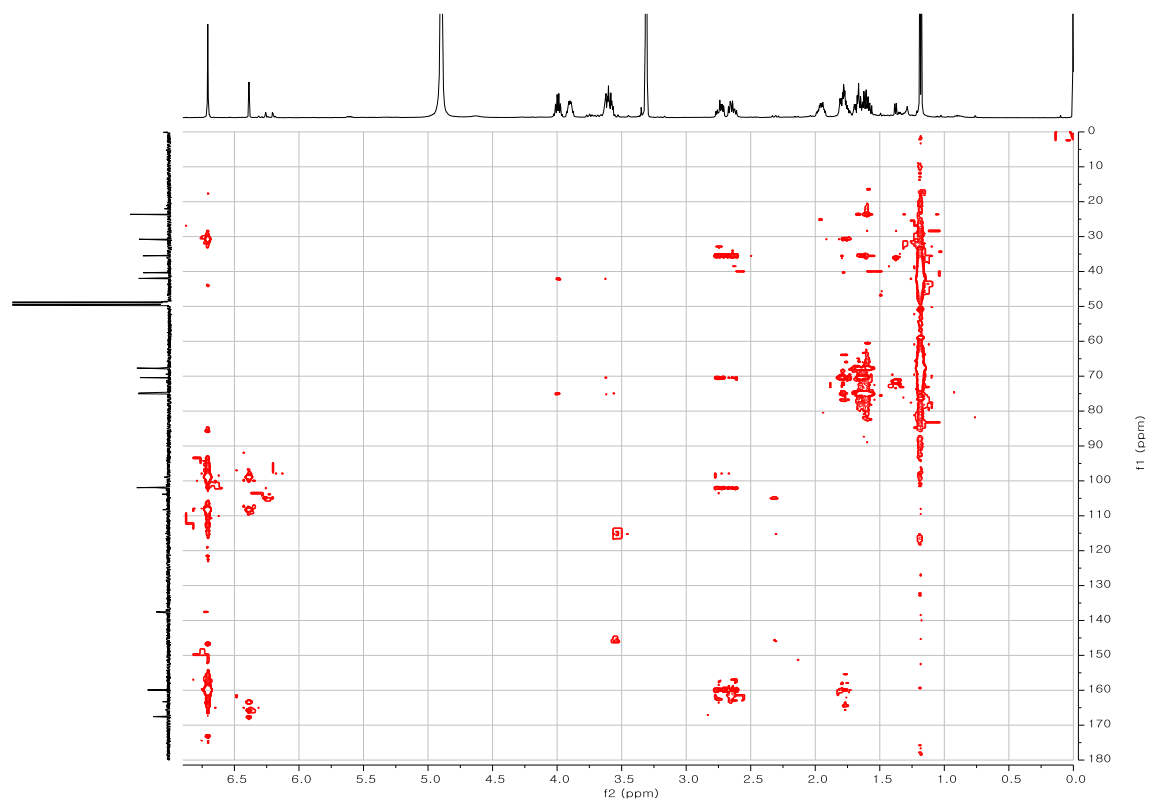

**Figure S28.** HETLOC spectrum (800 MHz, CD<sub>3</sub>OD) of (3)

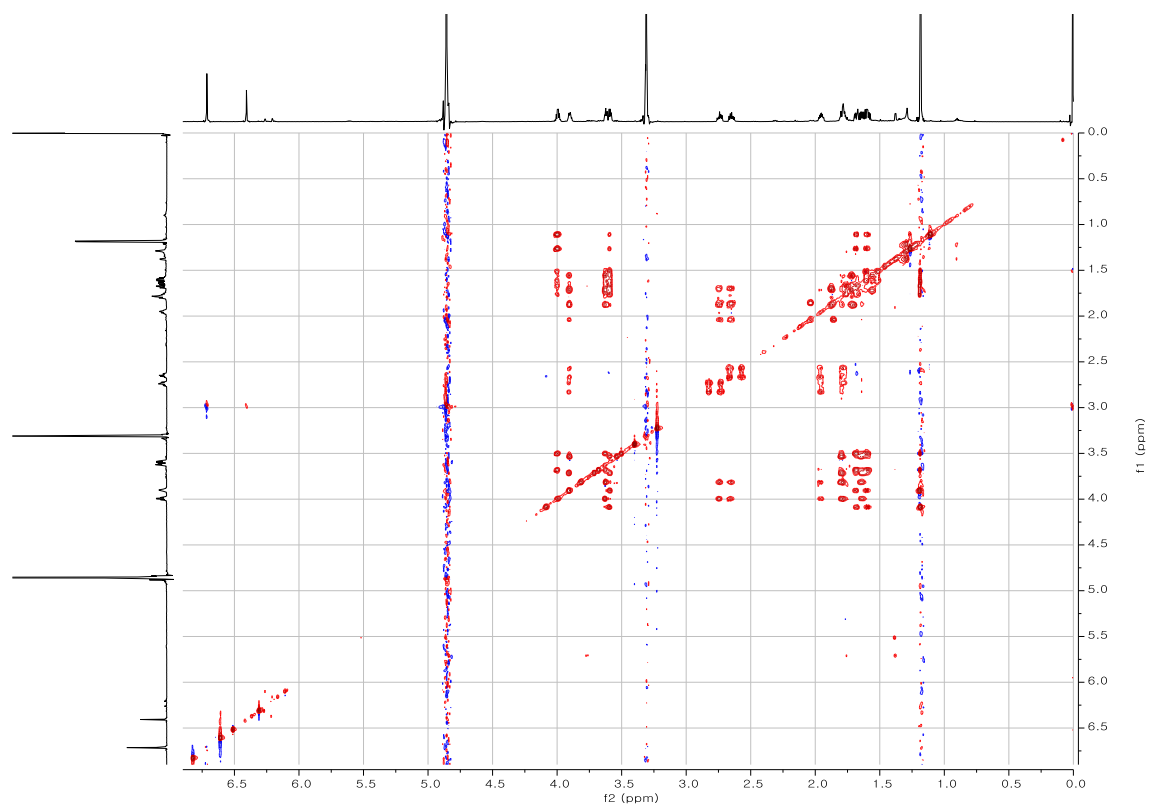

**Figure S29.**  $^1\text{H}$  NMR spectrum (500 MHz,  $\text{CD}_3\text{OD}$ ) of acetonide product (**3a**)

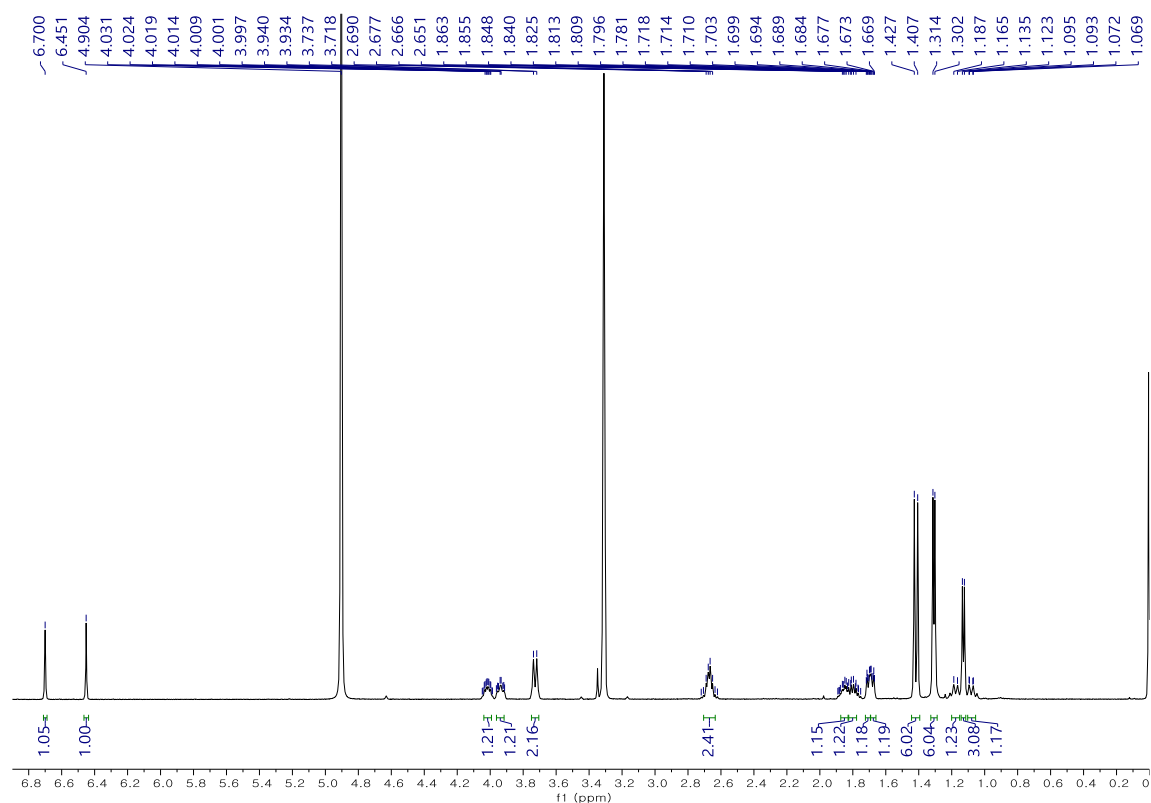

**Figure S30.**  $^{13}\text{C}$  NMR spectrum (125 MHz,  $\text{CD}_3\text{OD}$ ) of acetonide product (**3a**)

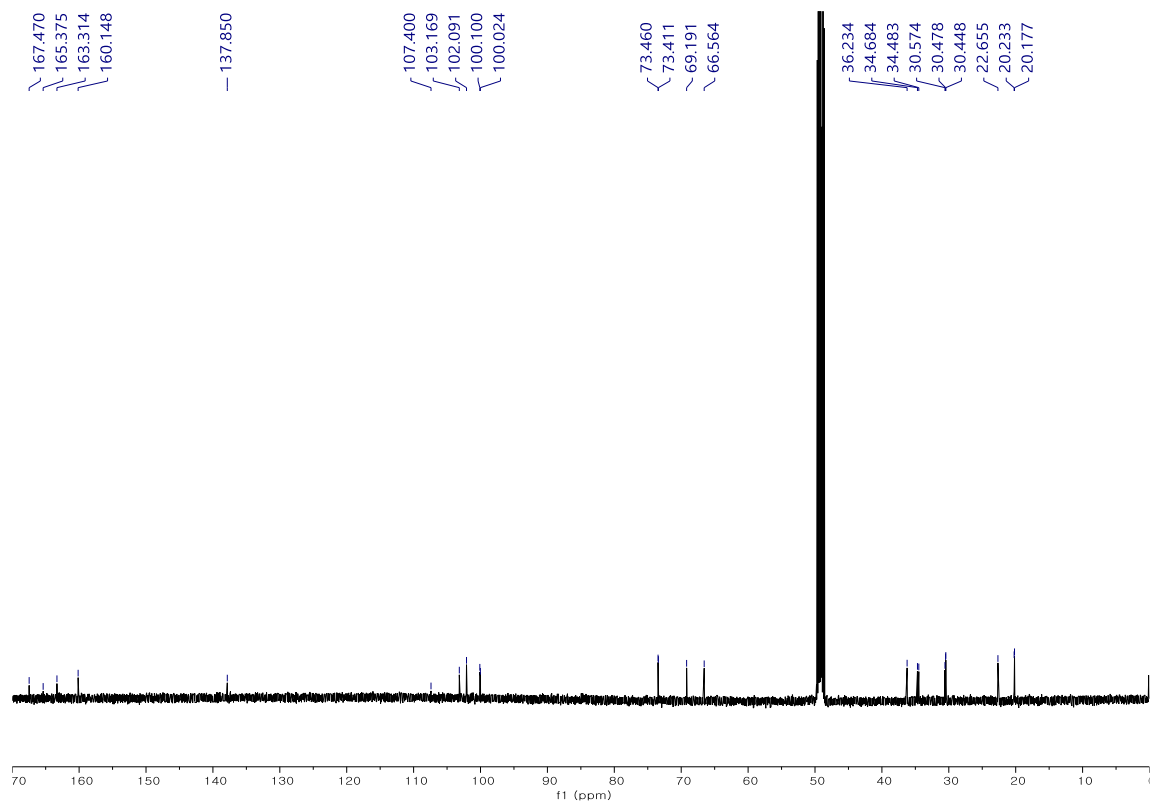

**Figure S31.** HMBC spectrum (500 MHz, CD<sub>3</sub>OD) of acetonide product (**3a**)

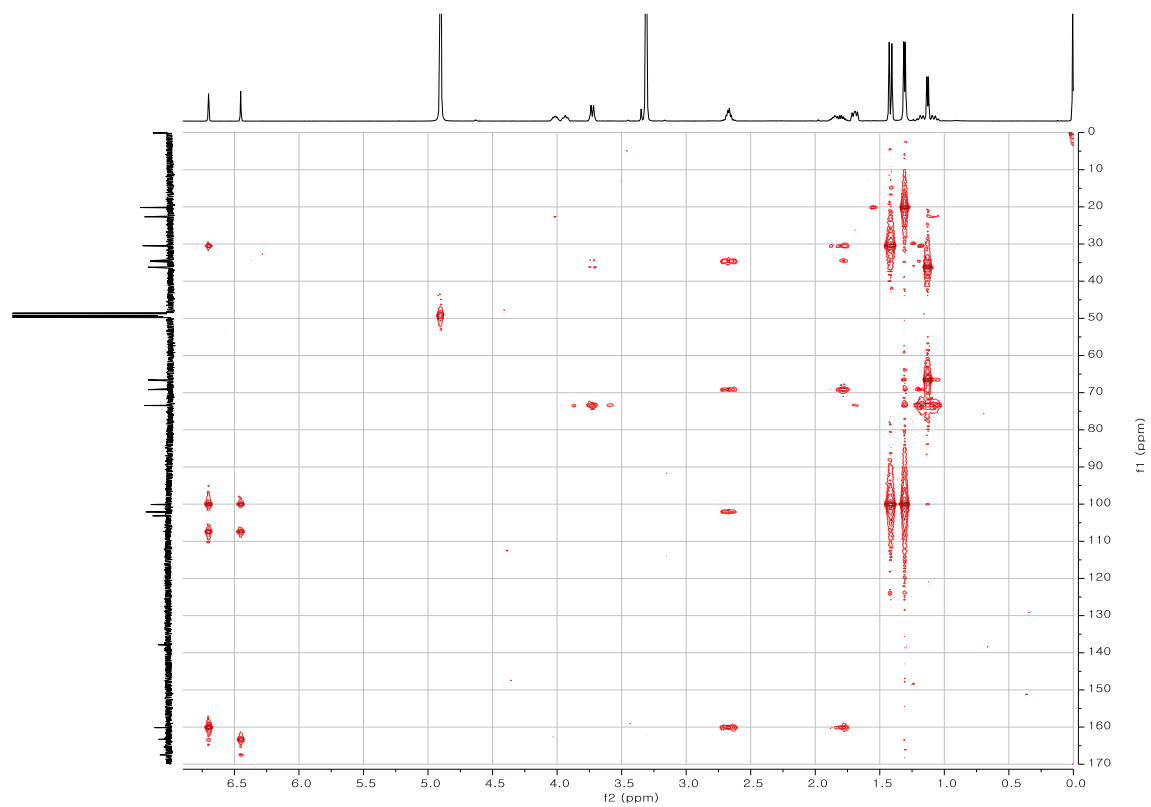

Figure S32. HRESIMS spectrum of (3)

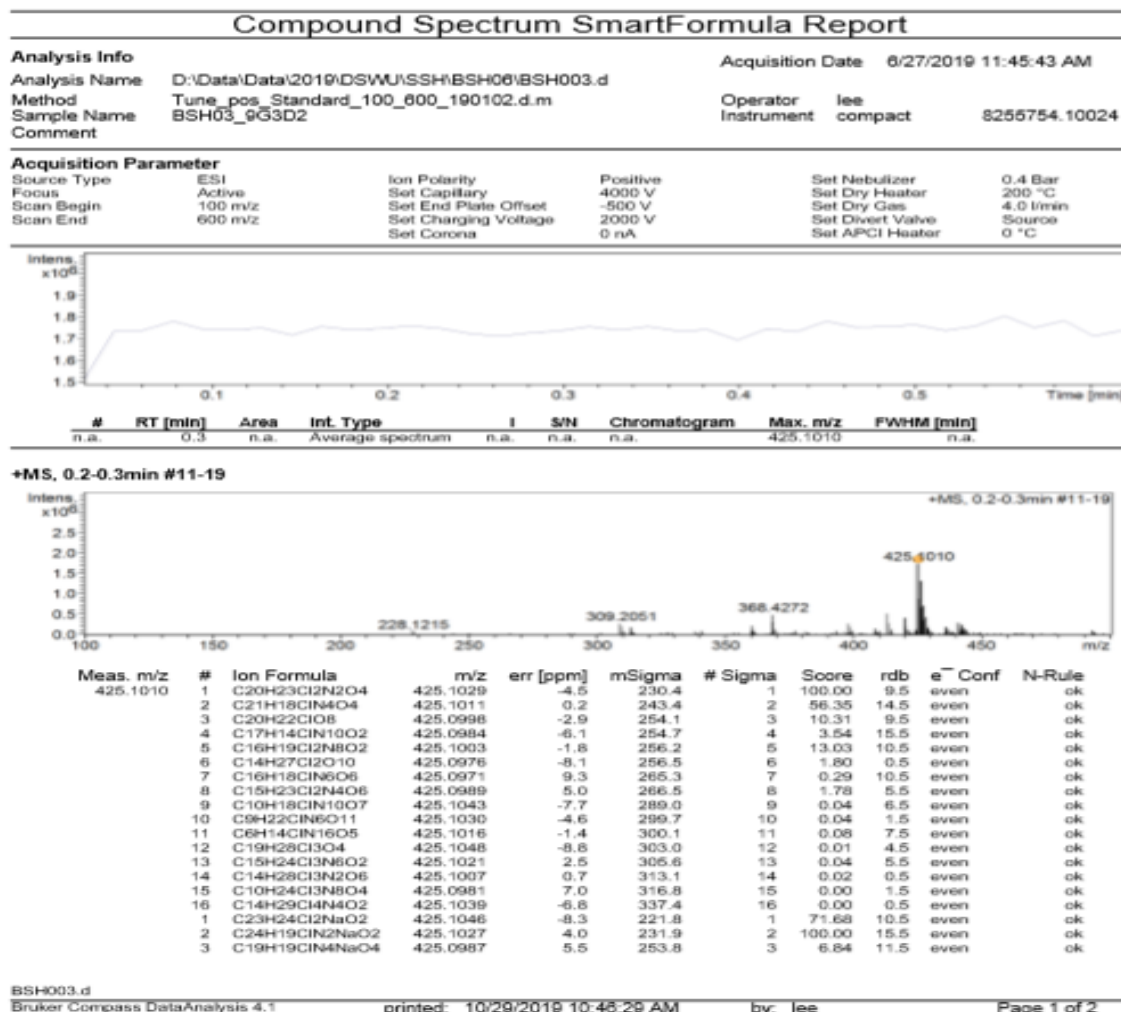

**Compound Spectrum SmartFormula Report**

| Meas. m/z | #  | Ion Formula     | m/z      | err [ppm] | mSigma | # Sigma | Score | rdB | e <sup>-</sup> Conf | N-Rule |
|-----------|----|-----------------|----------|-----------|--------|---------|-------|-----|---------------------|--------|
|           | 4  | C18H24Cl2N2NaO4 | 425.1005 | 1.2       | 256.6  | 4       | 20.06 | 6.5 | even                | ok     |
|           | 5  | C14H20Cl2N8NaO2 | 425.0978 | -7.5      | 264.3  | 5       | 1.22  | 7.5 | even                | ok     |
|           | 6  | C18H23ClN4NaO8  | 425.0974 | 8.6       | 264.5  | 6       | 0.60  | 6.5 | even                | ok     |
|           | 7  | C12H23ClN4NaO9  | 425.1046 | 8.4       | 288.2  | 7       | 0.04  | 2.5 | even                | ok     |
|           | 8  | C9H15ClN14NaO3  | 425.1032 | 5.2       | 288.7  | 8       | 0.15  | 8.5 | even                | ok     |
|           | 9  | C8H19ClN10NaO7  | 425.1019 | 2.0       | 299.3  | 9       | 0.10  | 3.5 | even                | ok     |
|           | 10 | C17H29Cl3NaO4   | 425.1024 | -3.2      | 306.8  | 10      | 0.04  | 1.5 | even                | ok     |
|           | 11 | C13H25Cl3N6NaO2 | 425.0997 | -3.2      | 309.9  | 11      | 0.03  | 2.5 | even                | ok     |

**Figure S33.**  $^1\text{H}$  NMR spectrum (500 MHz,  $\text{CD}_3\text{OD}$ ) of (**4**)

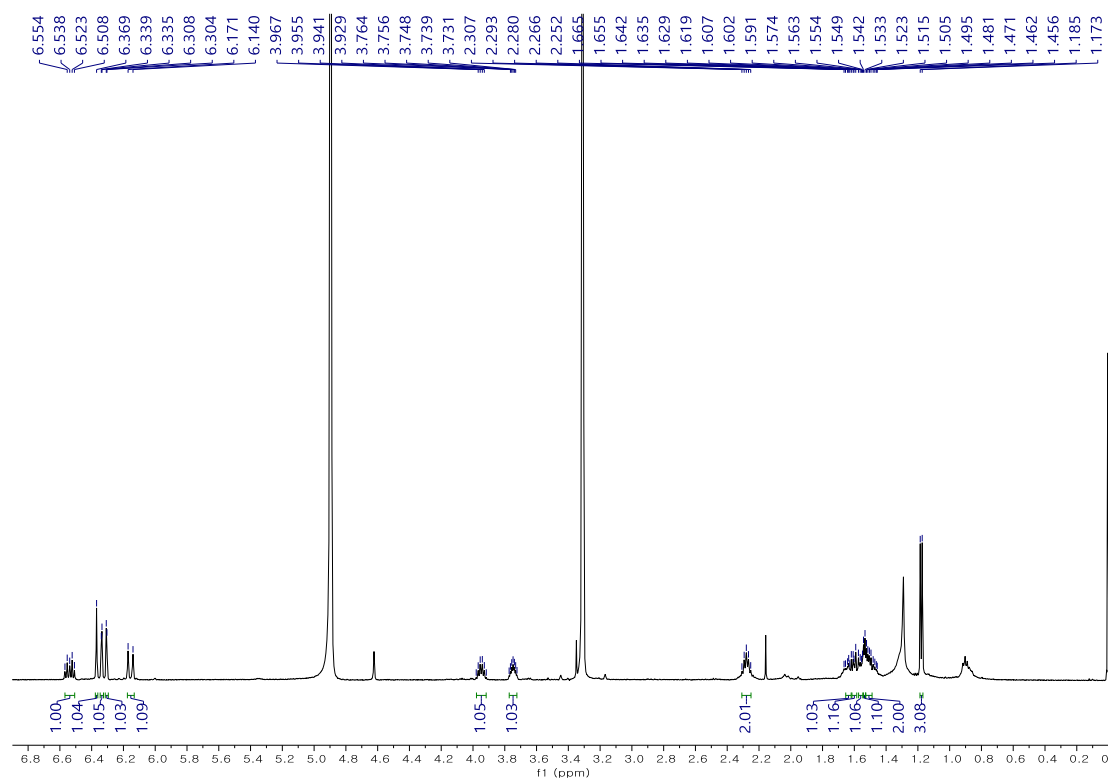

**Figure S34.**  $^{13}\text{C}$  NMR spectrum (125 MHz,  $\text{CD}_3\text{OD}$ ) of (**4**)

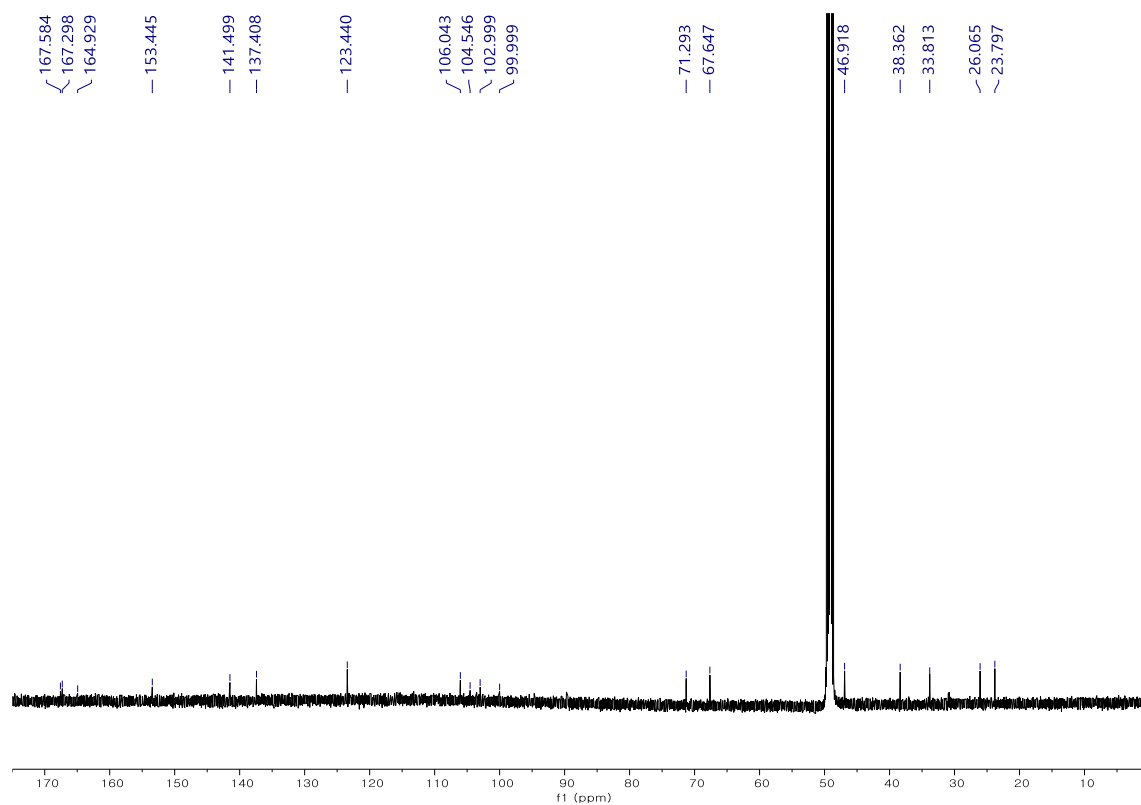

**Figure S35.**  $^1\text{H}$ - $^1\text{H}$  COSY spectrum (500 MHz,  $\text{CD}_3\text{OD}$ ) of (4)

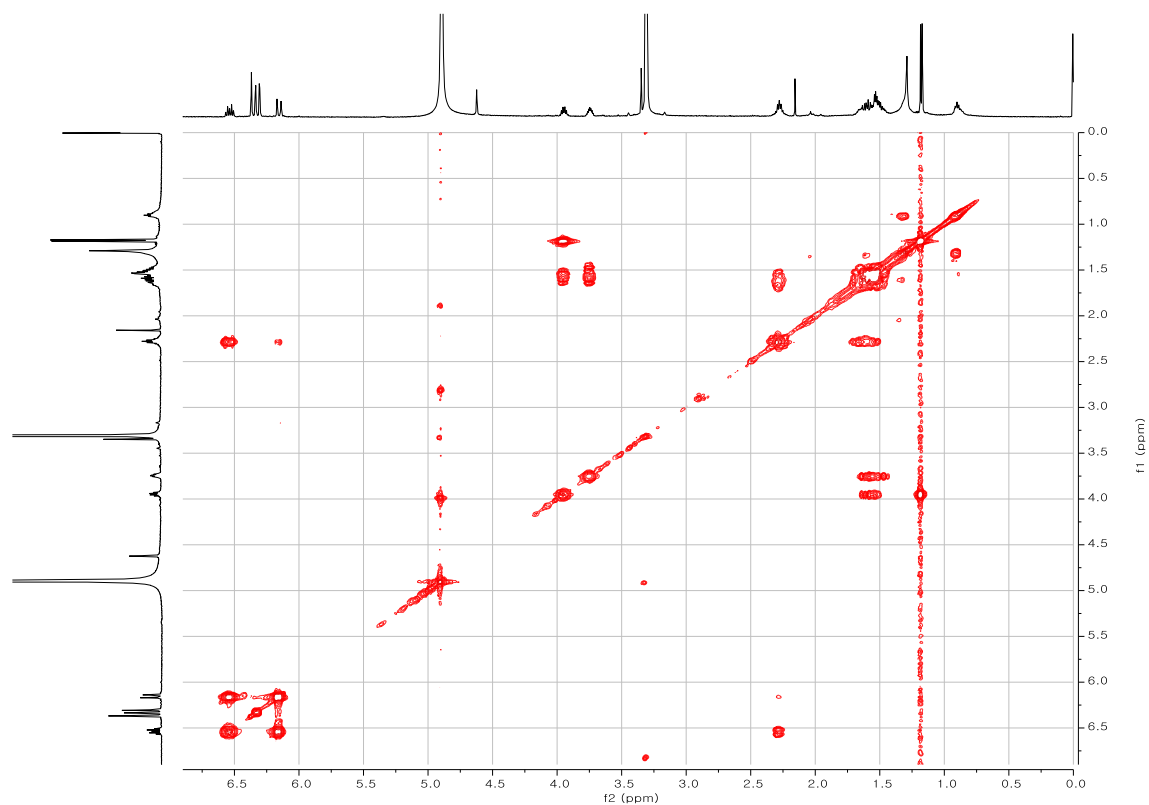

**Figure S36.** HSQC spectrum (500 MHz,  $\text{CD}_3\text{OD}$ ) of (4)

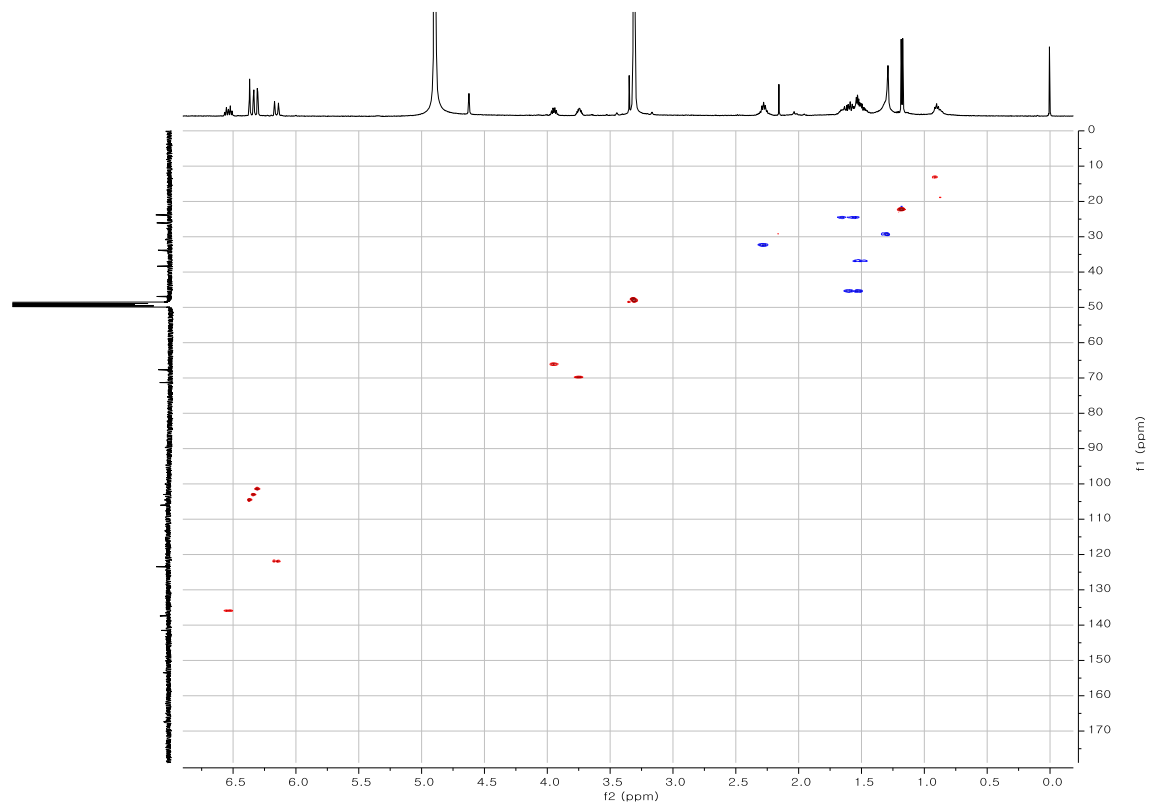



**Figure S37.** HMBC spectrum (500 MHz, CD<sub>3</sub>OD) of (4)

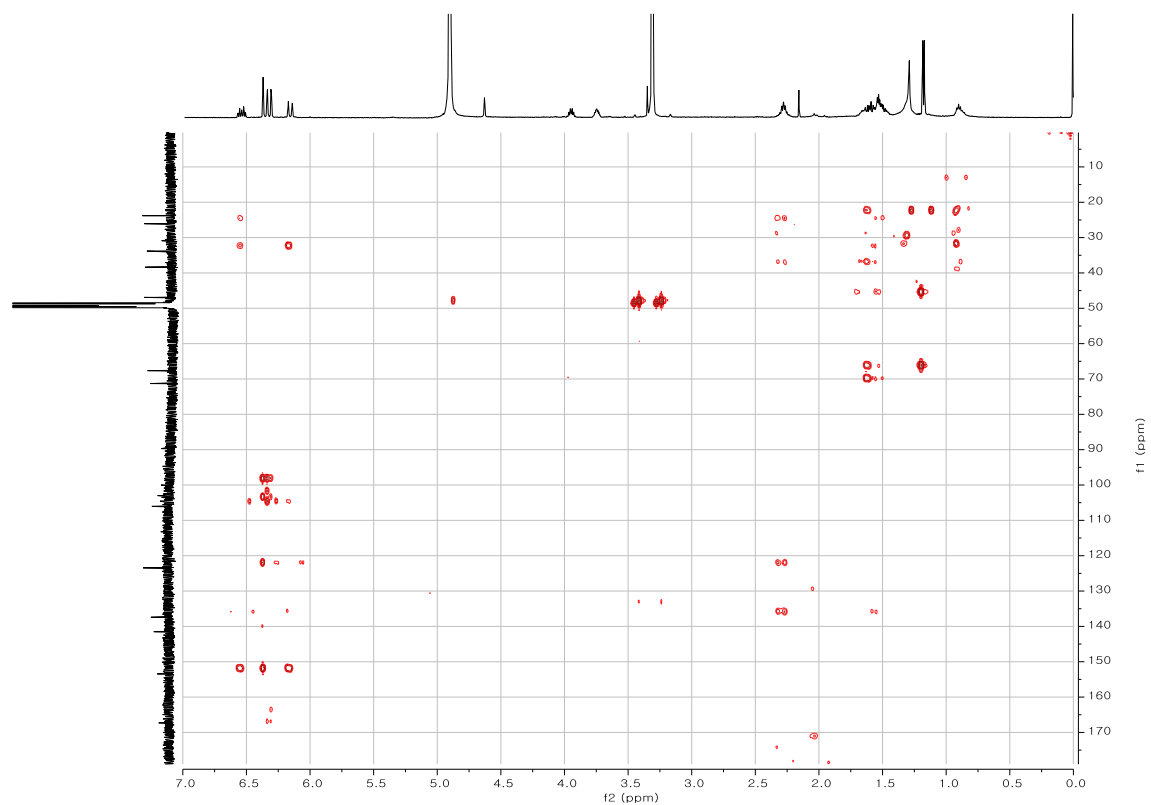

Figure S38. HRESIMS spectrum of (4)

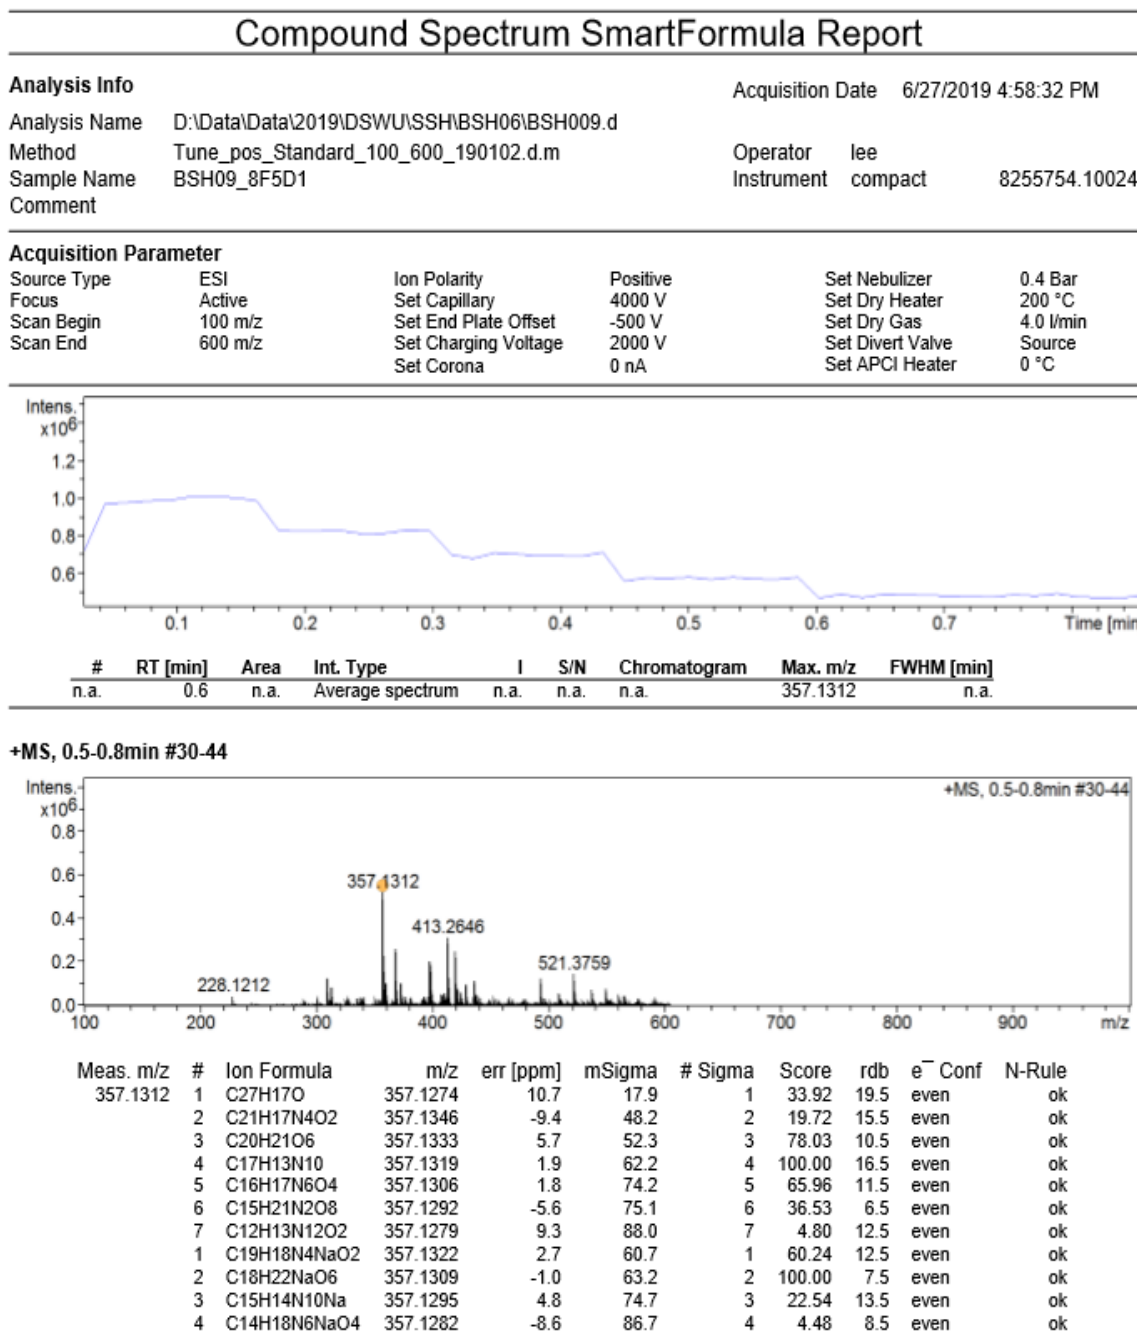

**Figure S39.**  $^1\text{H}$  NMR spectrum (500 MHz,  $\text{CD}_3\text{OD}$ ) of (**5**)

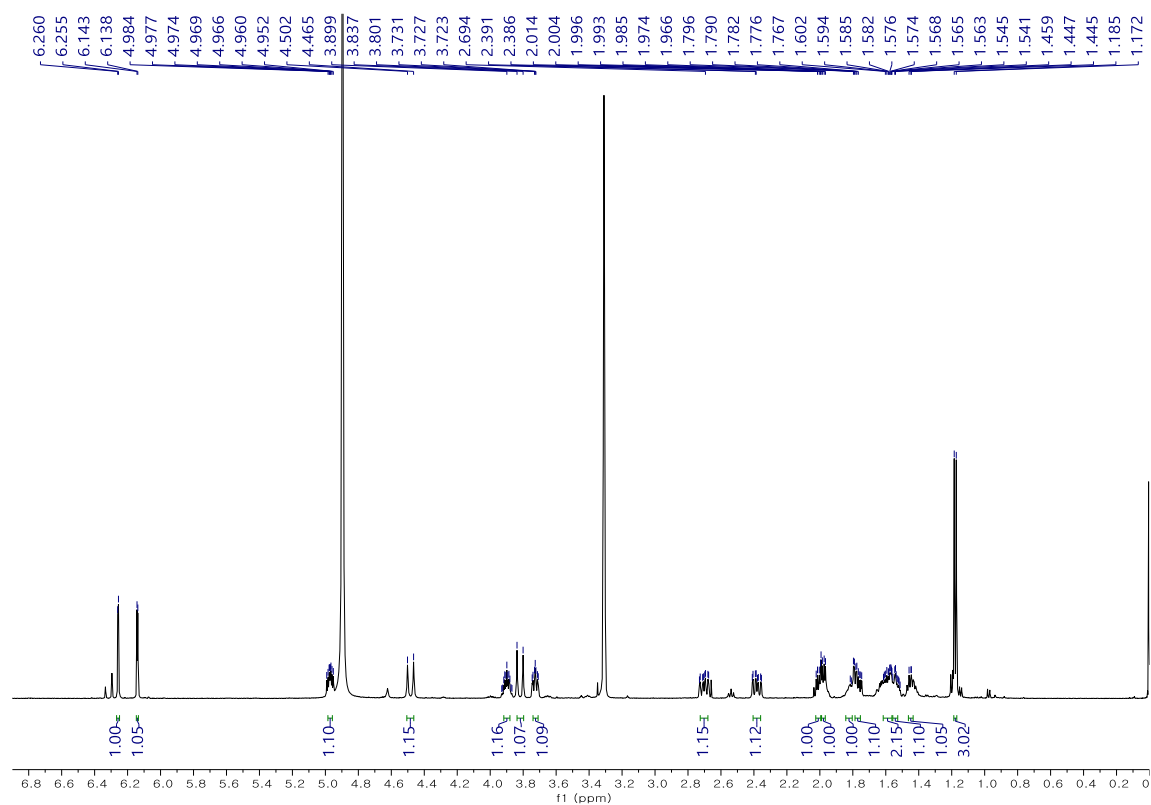

**Figure S40.**  $^{13}\text{C}$  NMR spectrum (125 MHz,  $\text{CD}_3\text{OD}$ ) of (**5**)

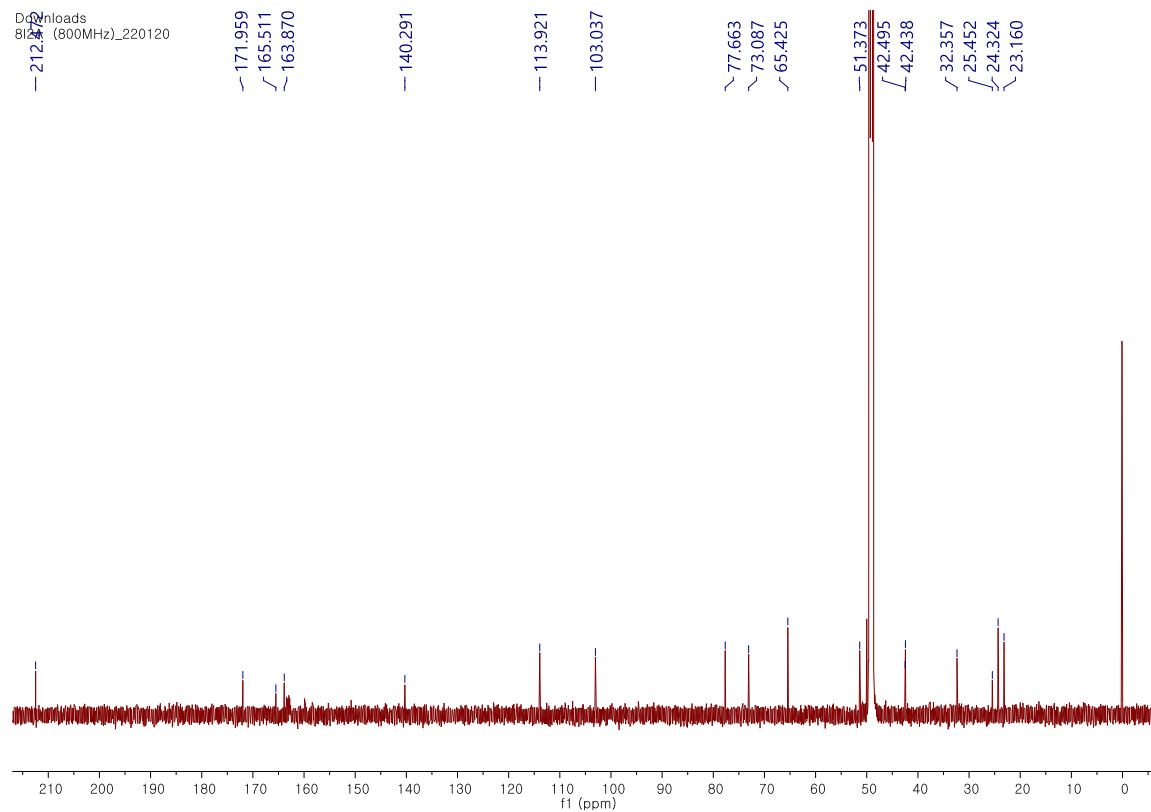

SSHee-8I2A(2022-01-25)  
8I2A: (800MHz)

**Figure S43.** HMBC spectrum (500 MHz, CD<sub>3</sub>OD) of **(5)**

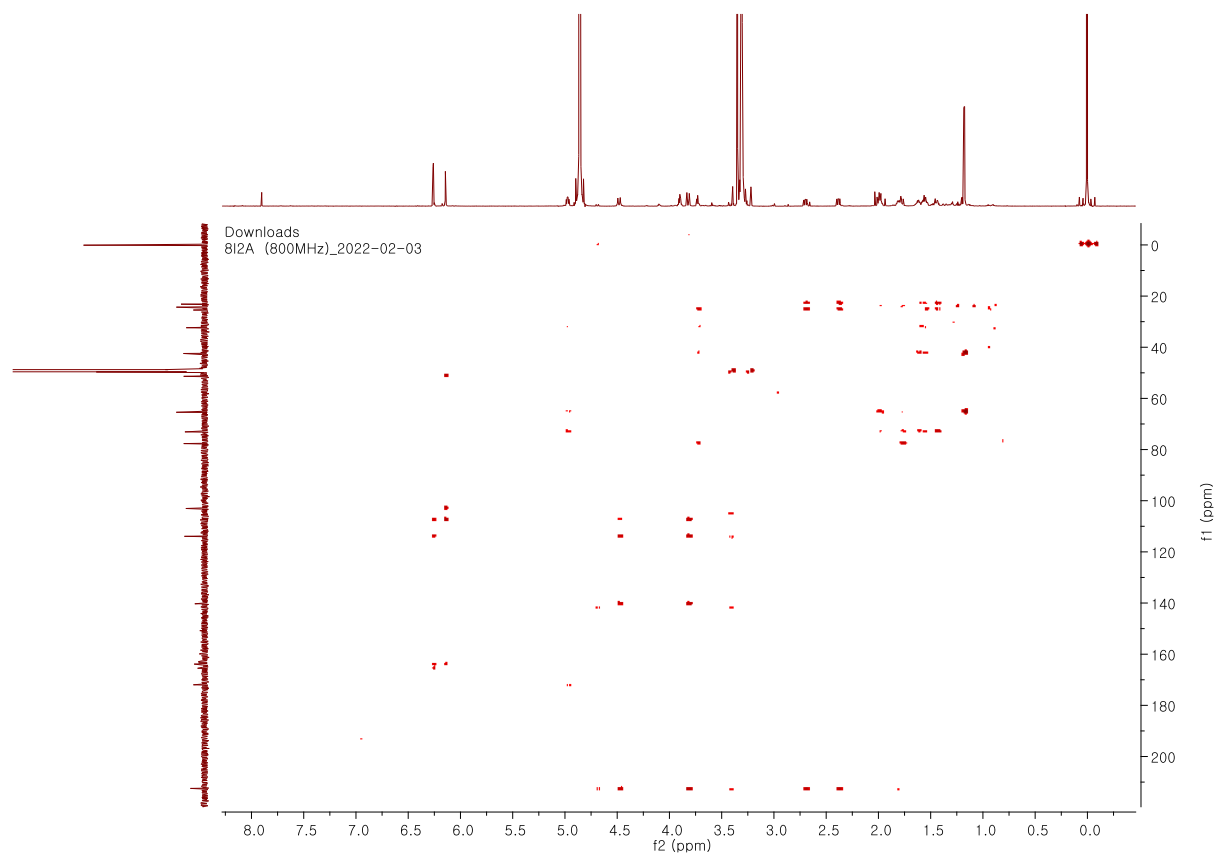

**Figure S44.** HRESIMS spectrum of (5)

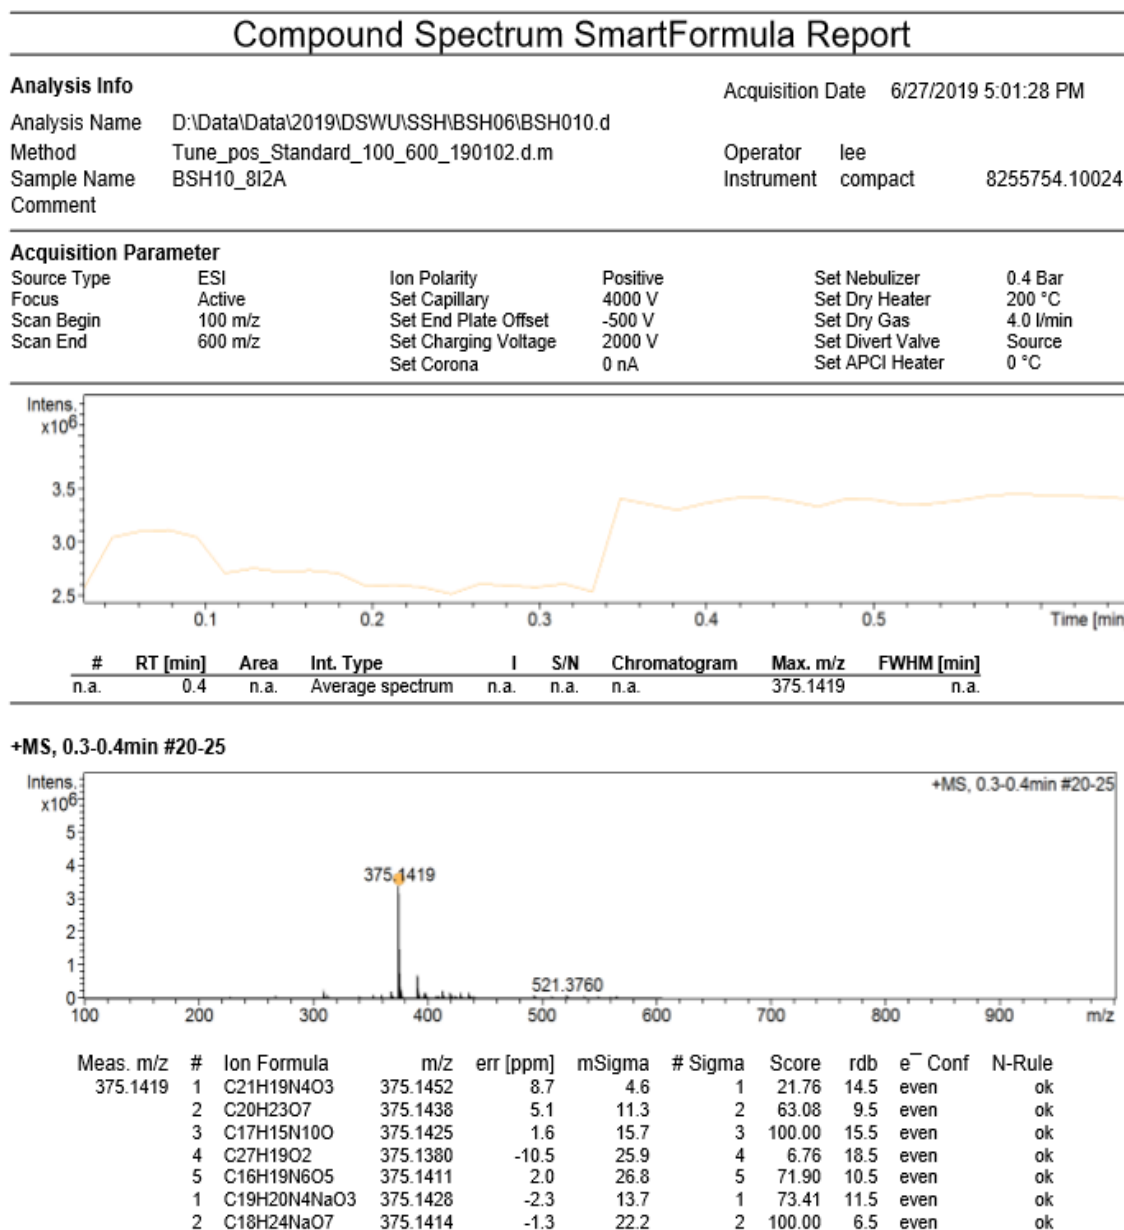

**Figure S45.**  $^1\text{H}$  NMR spectrum (500 MHz,  $\text{CD}_3\text{OD}$ ) of (6)

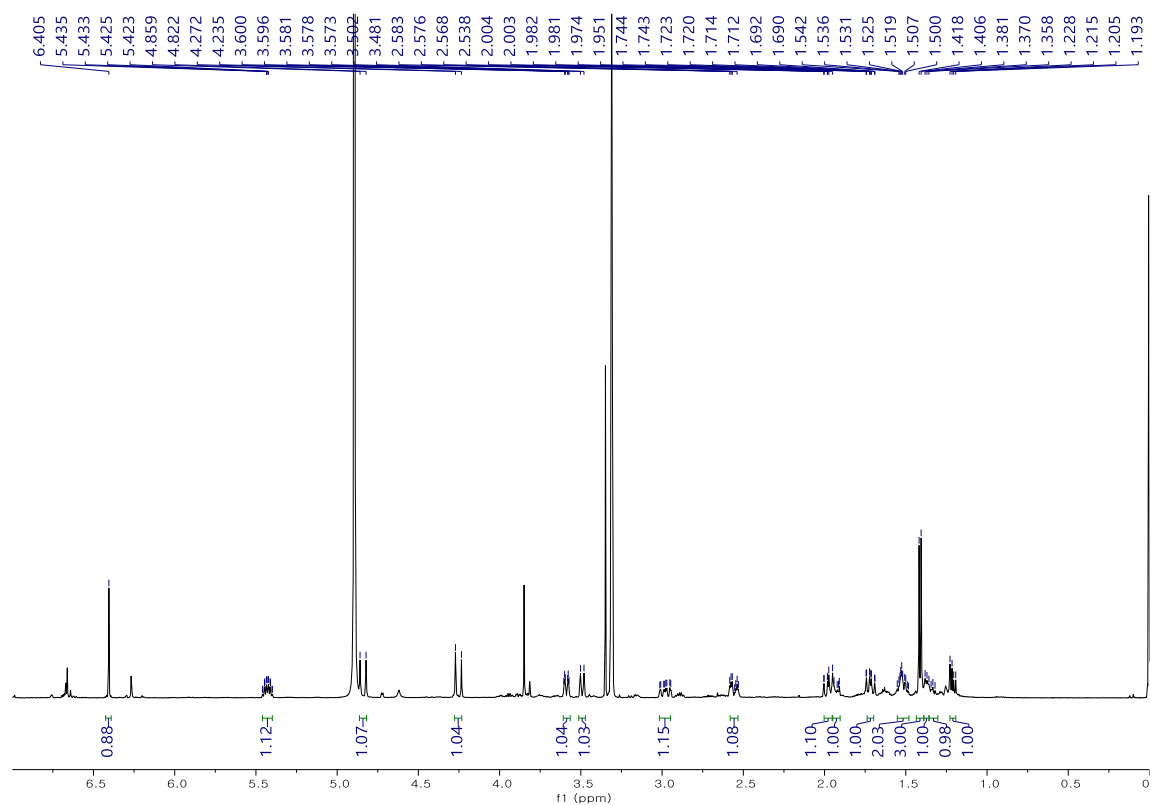

**Figure S46.**  $^{13}\text{C}$  NMR spectrum (125 MHz,  $\text{CD}_3\text{OD}$ ) of (6)

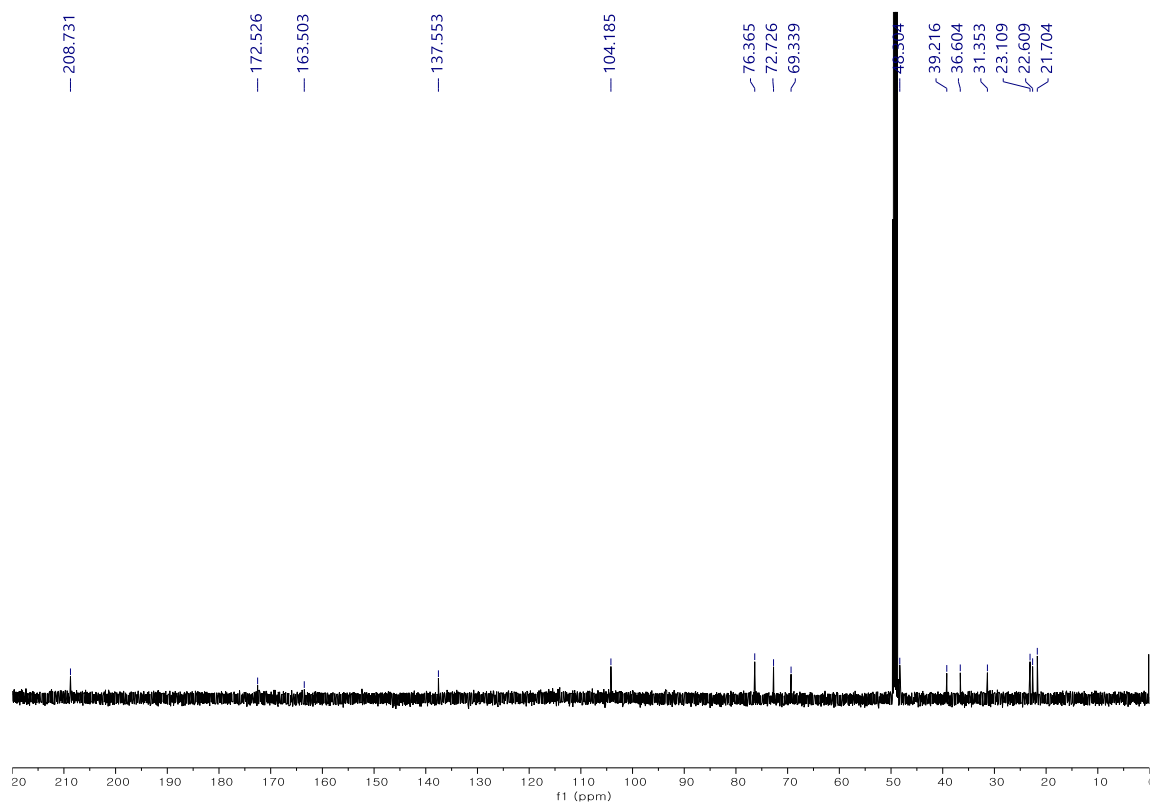

**Figure S47.**  $^1\text{H}$ - $^1\text{H}$  COSY spectrum (500 MHz,  $\text{CD}_3\text{OD}$ ) of (6)

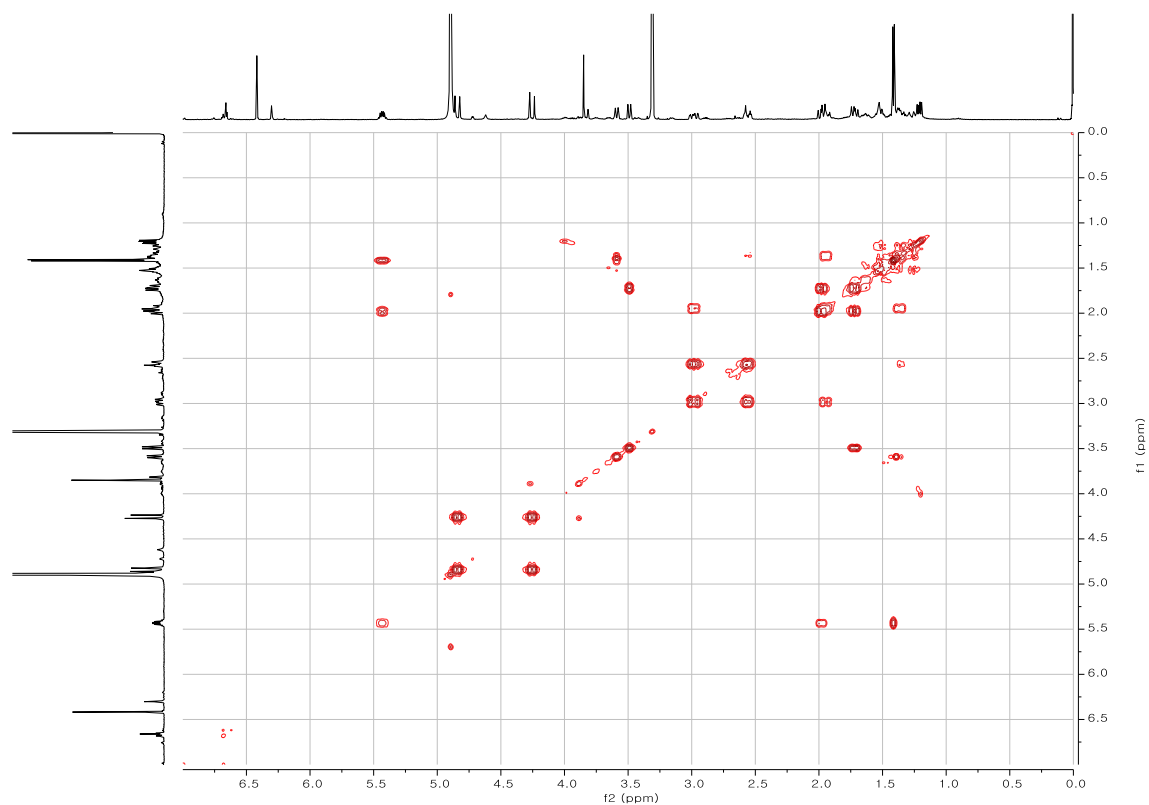

**Figure S48.** HSQC spectrum (500 MHz,  $\text{CD}_3\text{OD}$ ) of (6)

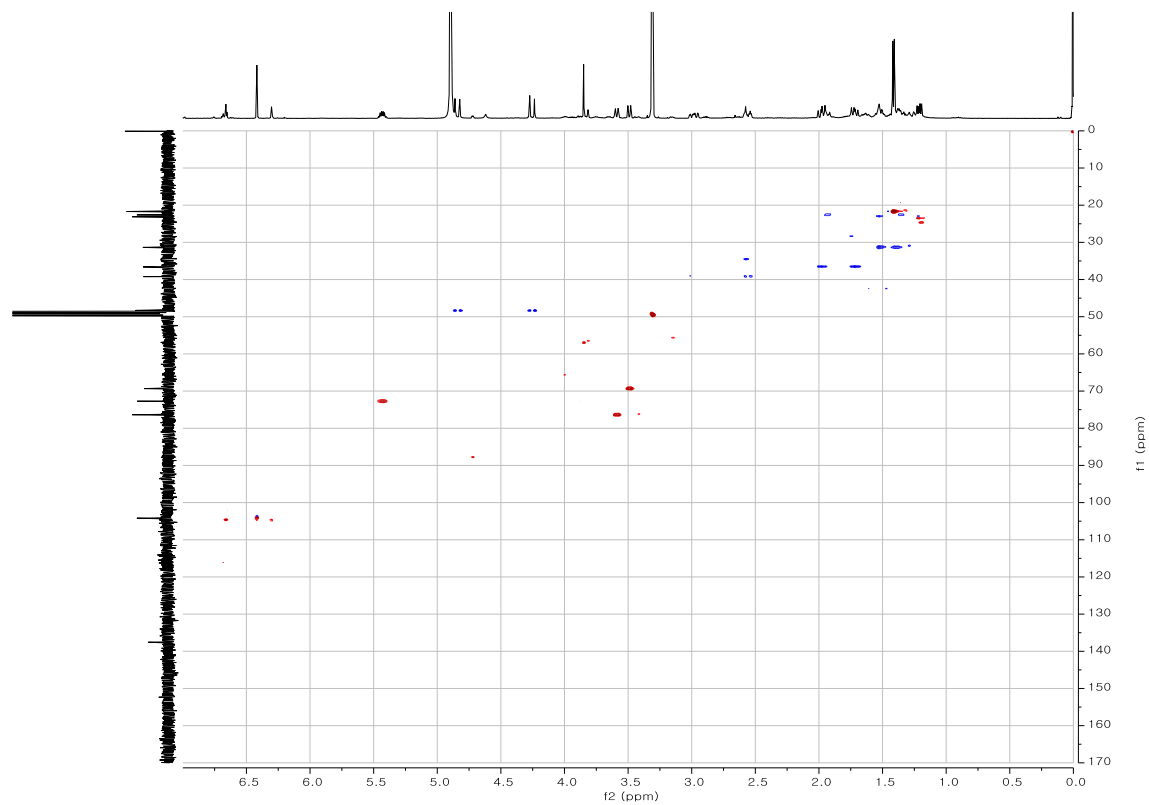



**Figure S49.** HMBC spectrum (500 MHz, CD<sub>3</sub>OD) of **(6)**

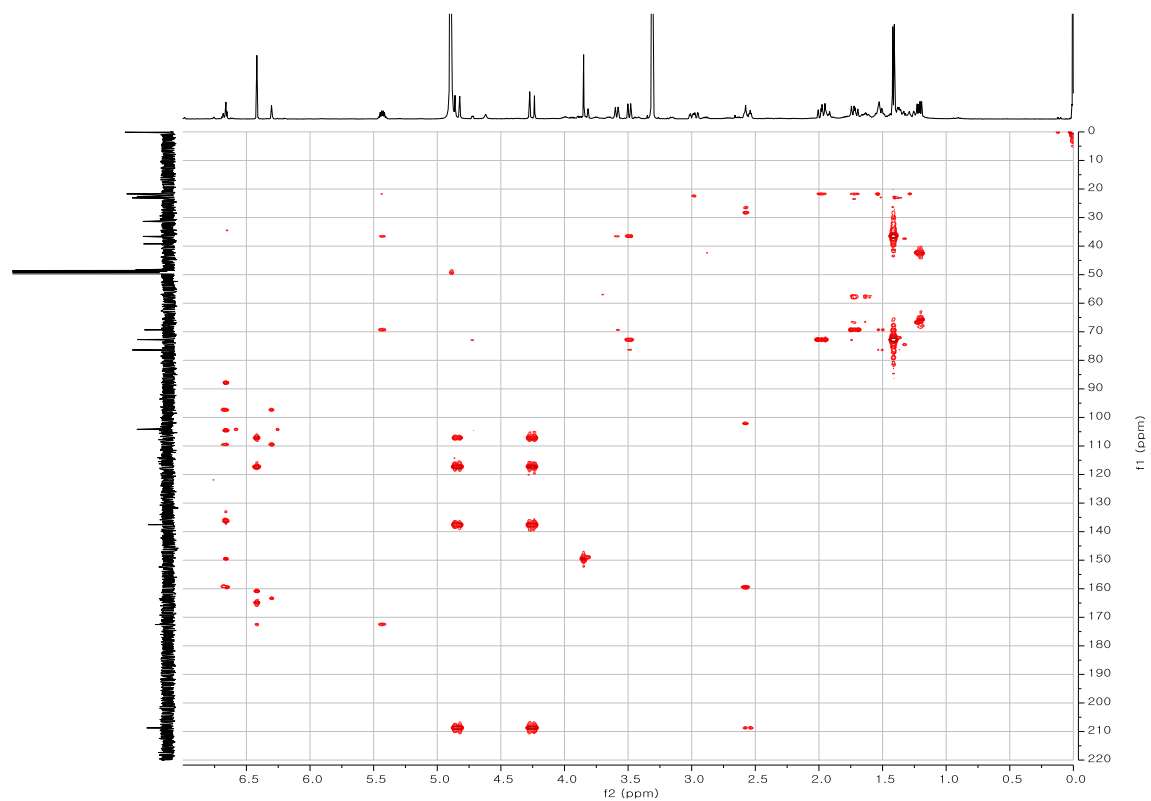

Figure S50. HRESIMS spectrum of (6)

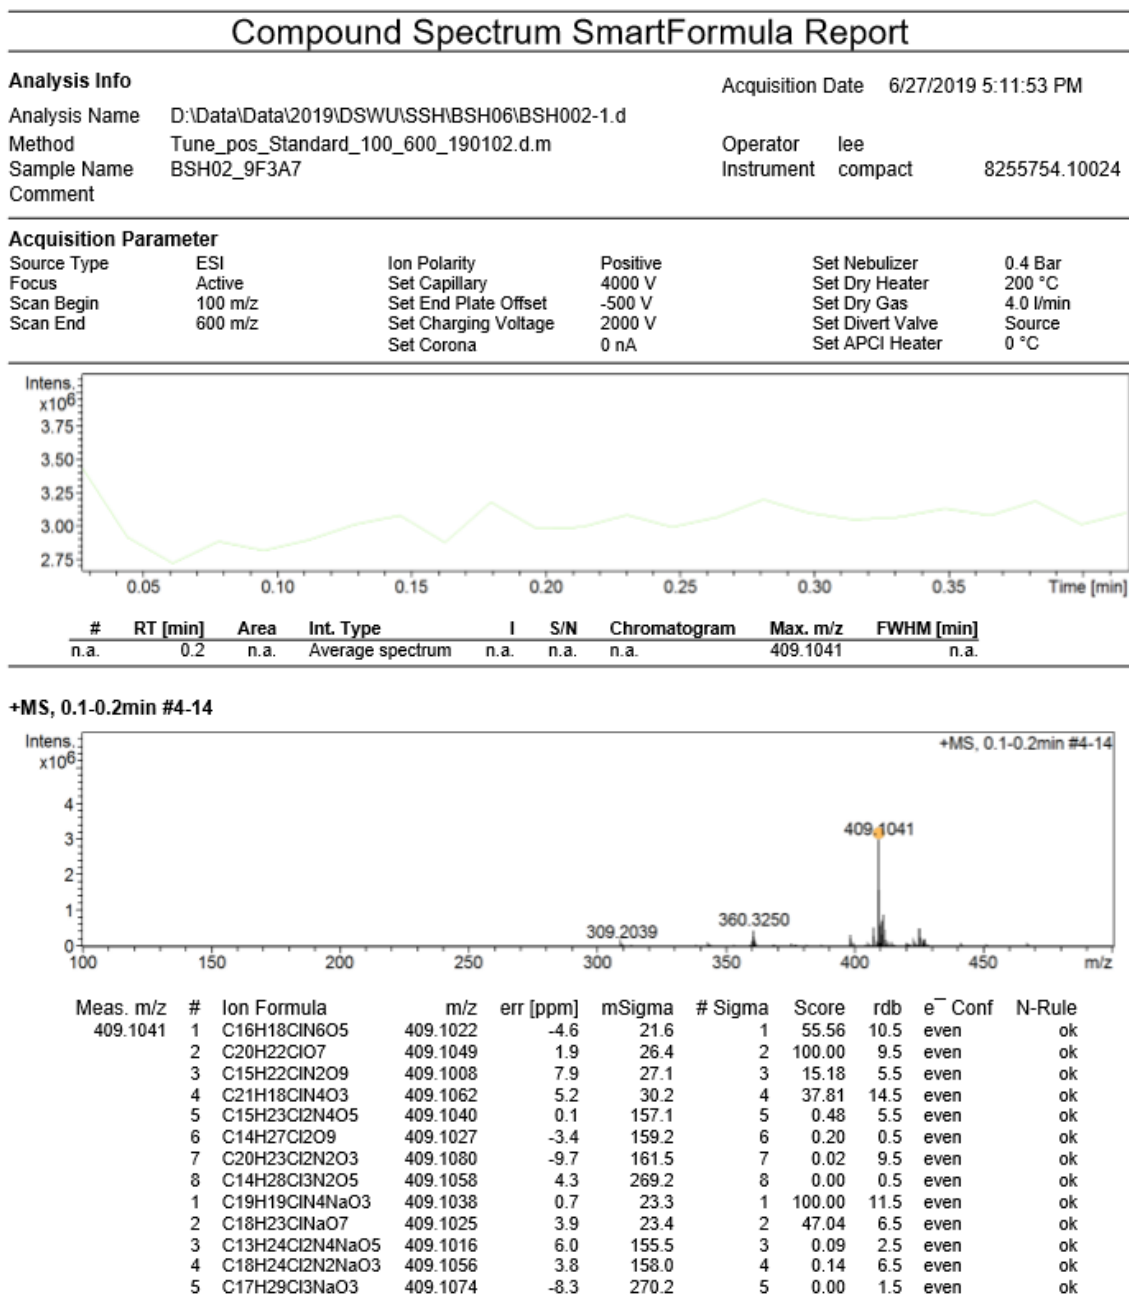

**Figure S51.**  $^1\text{H}$  NMR spectrum (500 MHz,  $\text{CD}_3\text{OD}$ ) of (**8**)

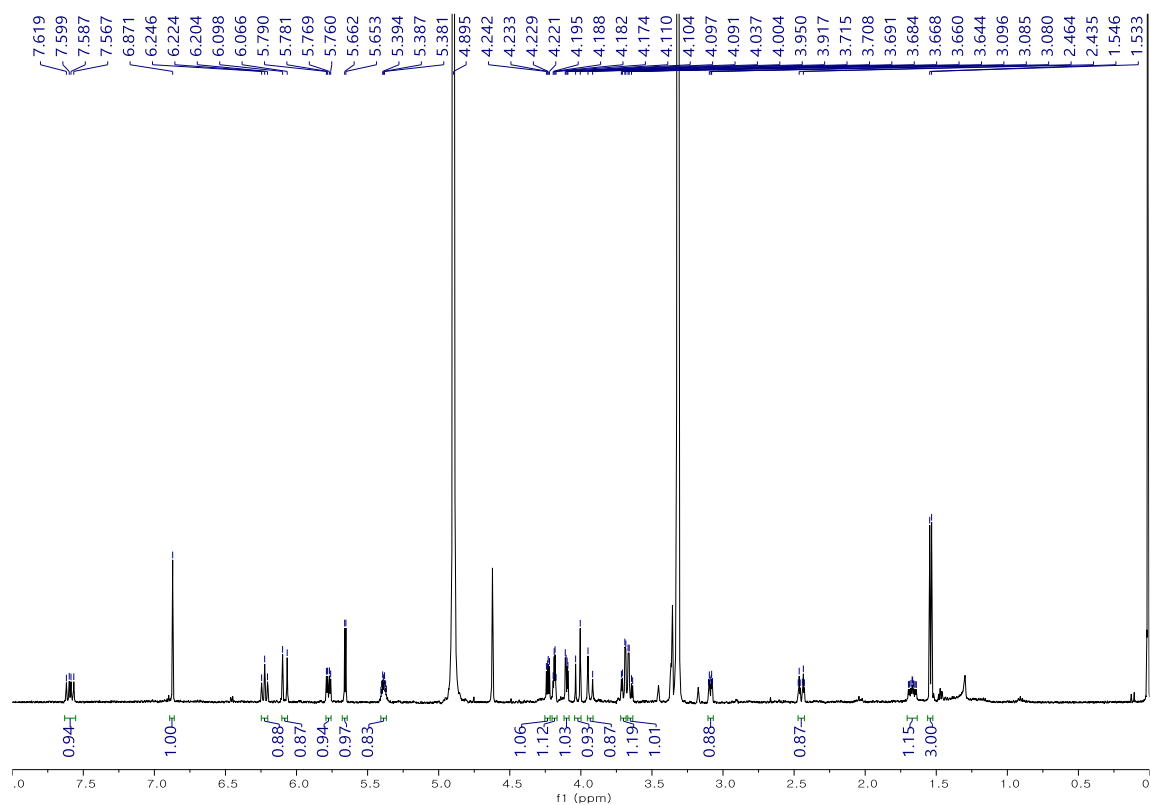

**Figure S52.**  $^{13}\text{C}$  NMR spectrum (125 MHz,  $\text{CD}_3\text{OD}$ ) of (**8**)

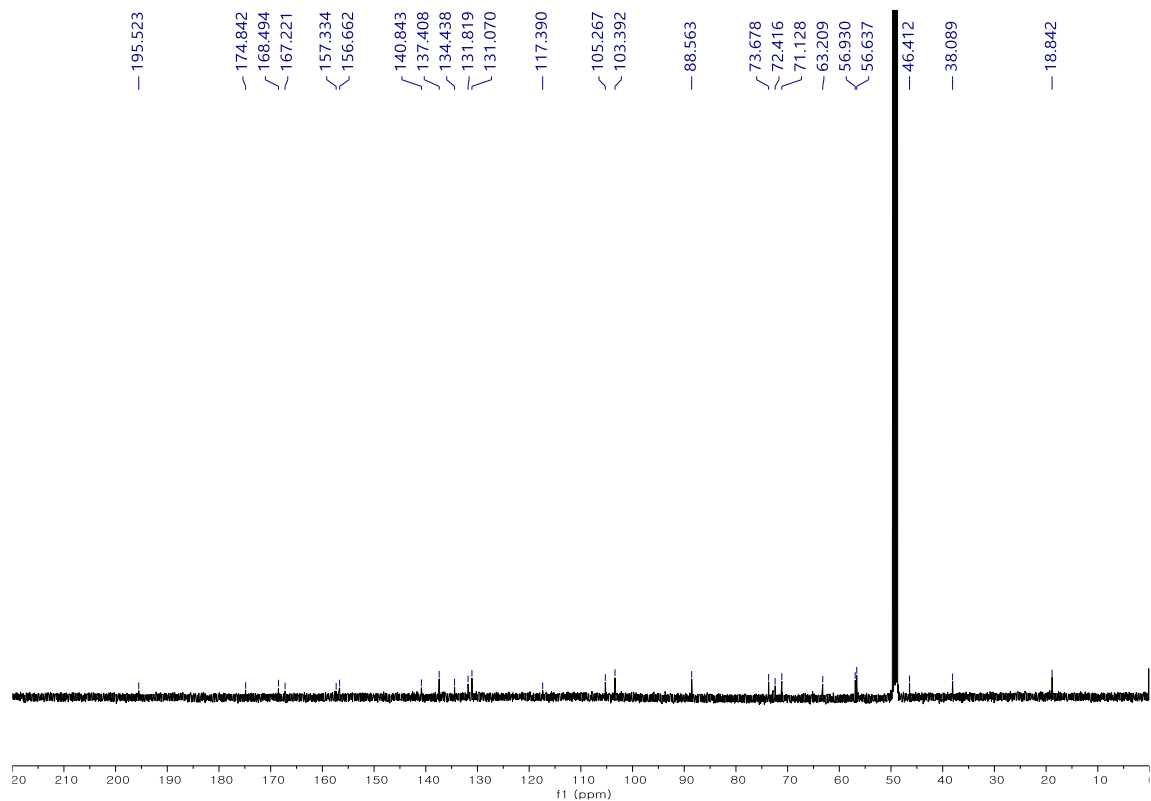

**Figure S53.**  $^1\text{H}$ - $^1\text{H}$  COSY spectrum (500 MHz,  $\text{CD}_3\text{OD}$ ) of (**8**)

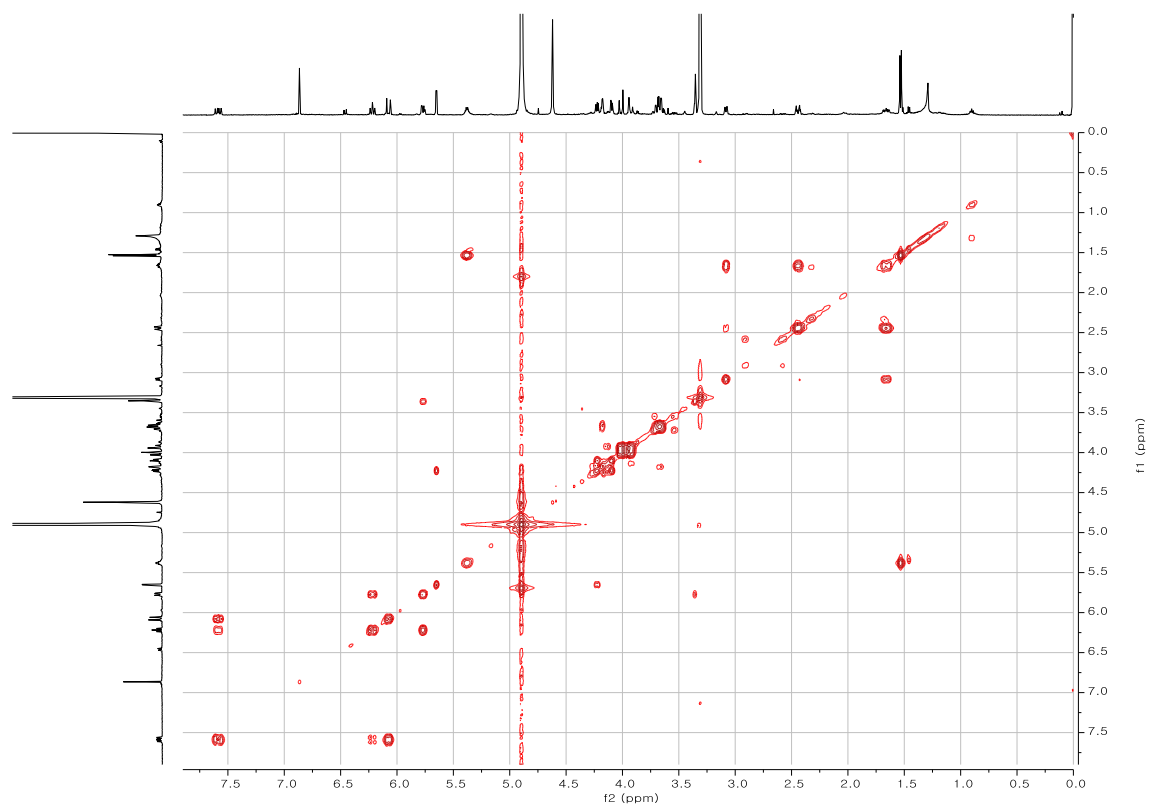

**Figure S54.** HSQC spectrum (500 MHz,  $\text{CD}_3\text{OD}$ ) of (**8**)

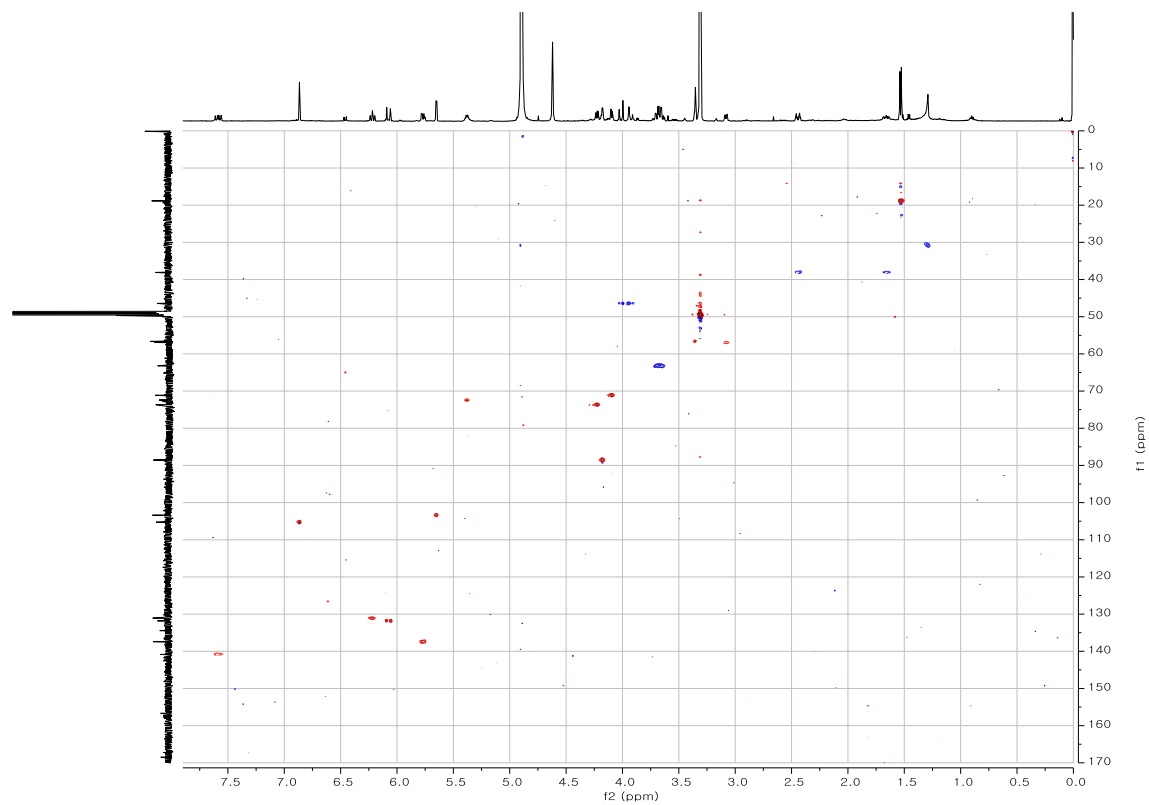

**Figure S55.** HMBC spectrum (500 MHz, CD<sub>3</sub>OD) of **(8)**

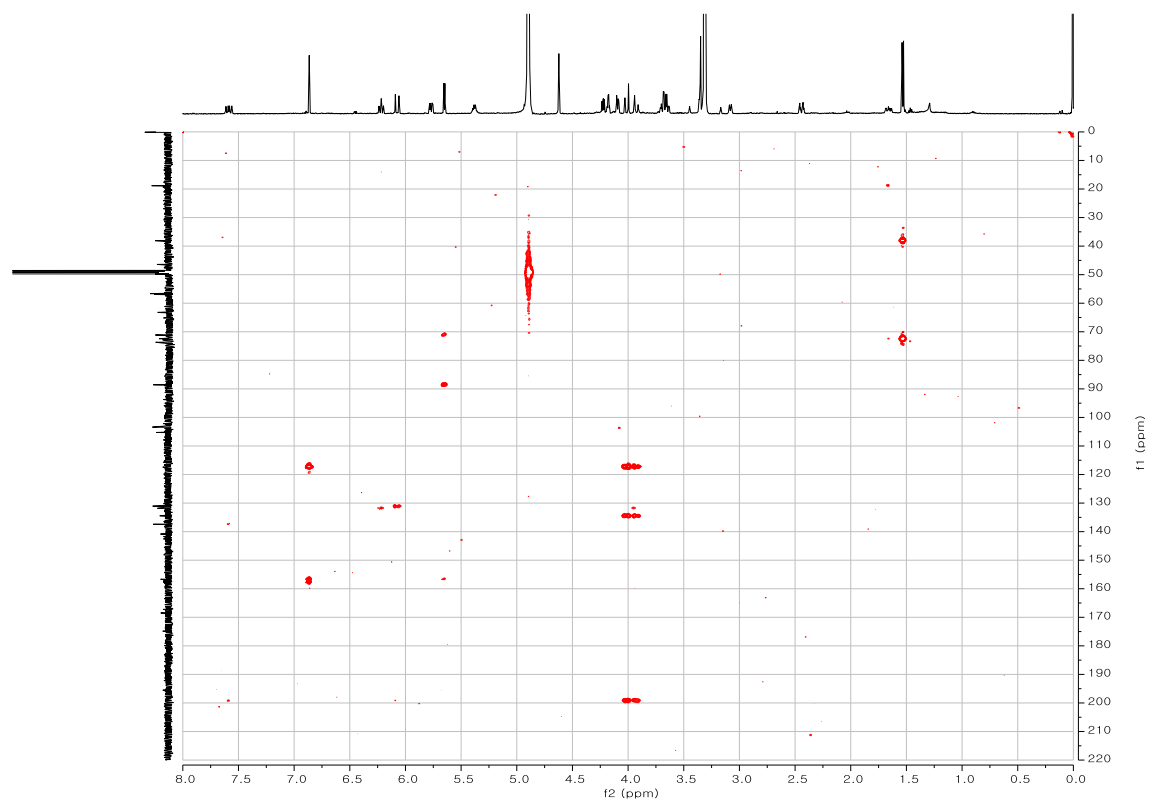

Figure S56. HRESIMS spectrum of (8)

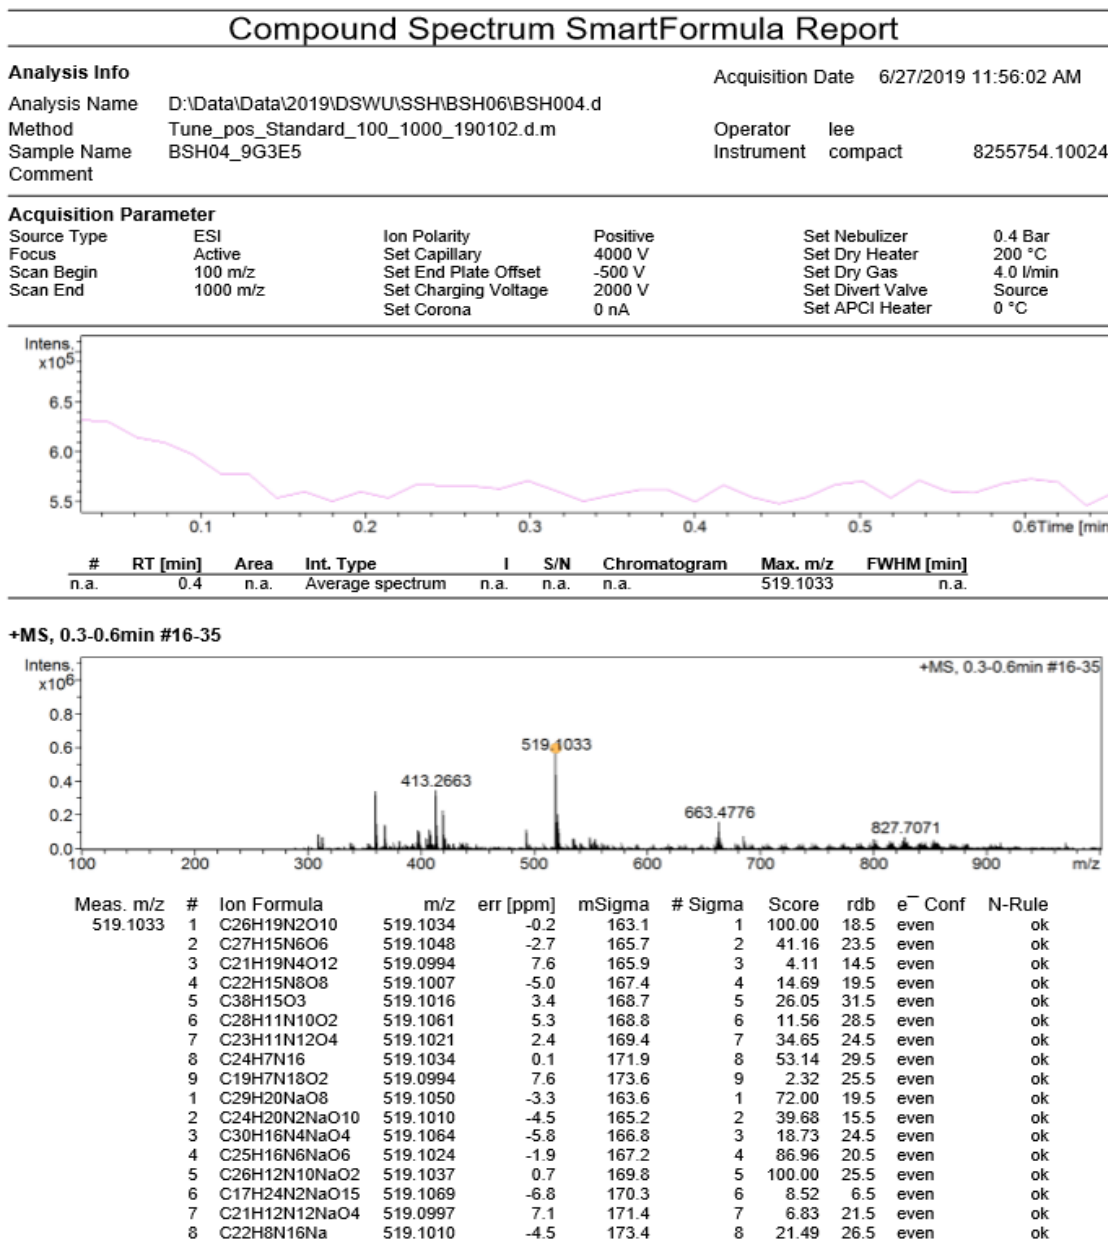

Supplement: s1 [file s1]
